# Supplementary material for: MRSD: A quantitative approach for assessing suitability of RNA-seq in the investigation of mis-splicing in Mendelian disease
Source: PubMed Central journal article supplement (PMC8874219; doi:10.1016/j.ajhg.2021.12.014), 2022-01-21
Supplement: mmc1.pdf [file mmc1.pdf]

**Supplemental information**

**MRSD: A quantitative approach for assessing  
suitability of RNA-seq in the investigation of  
mis-splicing in Mendelian disease**

**Charlie F. Rowlands, Algy Taylor, Gillian Rice, Nicola Whiffin, Hildegard Nikki Hall, William G. Newman, Graeme C.M. Black, kConFab Investigators, Raymond T. O'Keefe, Simon Hubbard, Andrew G.L. Douglas, Diana Baralle, Tracy A. Briggs, and Jamie M. Ellingford**

## List of Contents

### Figure S1

Categories of potentially pathogenic splicing events and their representation in analytical pipeline output

### Figure S2

Workflow for MRSD score generation

### Figure S3

Sequencing depths of RNA-seq samples used for evaluation of MRSD model accuracy

### Figure S4

MRSD scores vary among the different transcripts of individual genes

### Figure S5

Transcripts deemed as unfeasible through hierarchical selection are themselves likely to be unfeasible

### Figure S6

Effect of varying sequencing read length on MRSD model performance

### Figure S7

MRSD scores are generally lower when derived from RNA-seq runs of longer read length

### Figure S8

Evidence for 3' sequencing bias confounding the use of TPM as a guiding RNA-seq metric

### Figure S9

Exemplar events identified during pathogenic splice event analysis

### Figure S10

Relative gene expression level does not reflect the raw read coverage of transcript splice junctions

### Figure S11

Pairwise comparisons, by tissue, of MRSD scores for PanelApp disease gene

### Figure S12

Proportion of low-MRSD genes per tissue for all PanelApp panels, ordered by panel size

- a) Low-MRSD gene proportions for large panels (> 50 genes)
- b) Low-MRSD gene proportions for medium panels (21-50 genes)
- c) Low-MRSD gene proportions for small panels (11-20 genes)
- d) Low-MRSD gene proportions for very small panels ( $\leq 10$  genes)

### **Figure S13**

Proportion of low-MRSD genes per tissue for all PanelApp panels, ordered alphabetically by panel name

- a) **Low-MRSD gene proportions for panels named A-E**
- b) **Low-MRSD gene proportions for panels named F-L**
- c) **Low-MRSD gene proportions for panels named M-R**
- d) **Low-MRSD gene proportions for panels named S-X**

### **Figure S14**

Increasing specified read coverage reduces the number of ClinVar variants that can be analyzed

### **Figure S15**

Increasing specified read count removes highly VUS-prone genes from the scope of analysis

### **Table S1**

Summary of pathogenic splicing variants analyzed during this study

### **Table S2**

Summary of datasets used in this study

### **Methods S1**

Illustration of MRSD calculation methodology

### **Methods S2**

Tiering methodology for selection of transcripts for MRSD generation

### **Methods S3**

Tissue-specific criteria for filtering of high-quality GTEx control RNA-seq datasets

### **Methods S4**

Sample IDs of GTEx samples used to generate control datasets

**Skeletal muscle**

**Whole blood**

**EBV-transformed lymphocytes (LCLs)**

**Cultured fibroblasts**

### **Supplementary Results**

### **References**

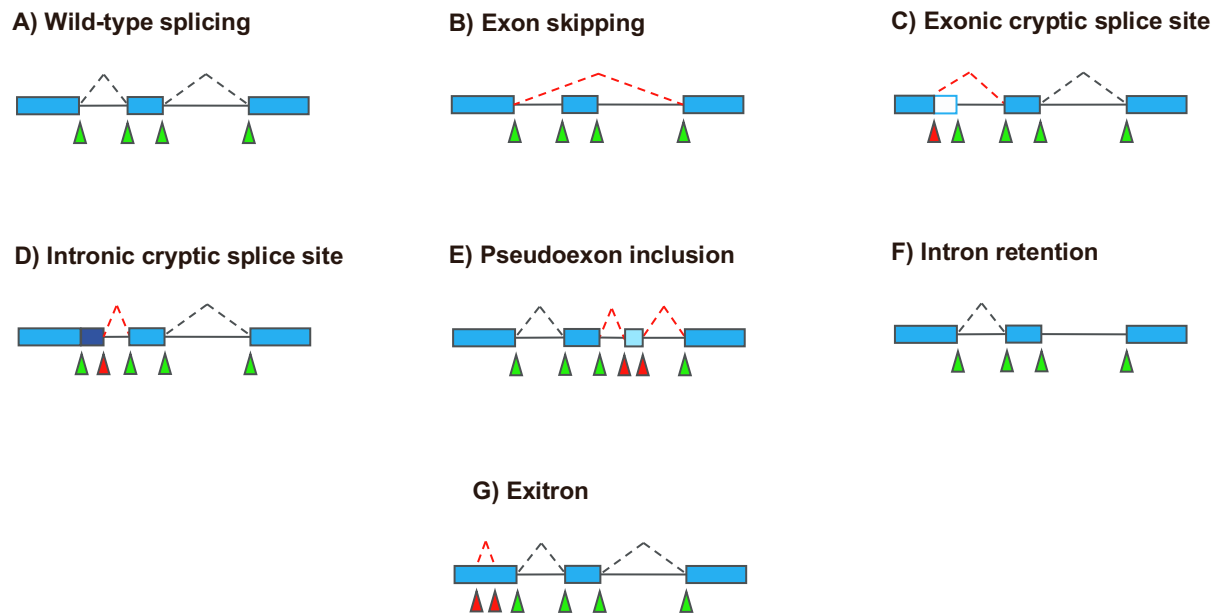

**Figure S1.** *Categories of potentially pathogenic splicing events and their representation in analytical pipeline output.* Disruption of (A) wild-type splicing may lead to (B) skipping of one or more exons, the creation of novel splice sites in (C) exonic or (D) intronic regions that may outcompete the canonical sites, or result in (E) the generation of an intronic pseudoexon. (F) Splicing may be abrogated completely, leading to total retention of the intron. (G) Within longer exons, creation of a novel splice site may lead to a so-called “exitron”, whereby a central portion of the exon is absent from the final transcript. Green triangles indicate canonical splice sites; red triangles indicate non-canonical sites.



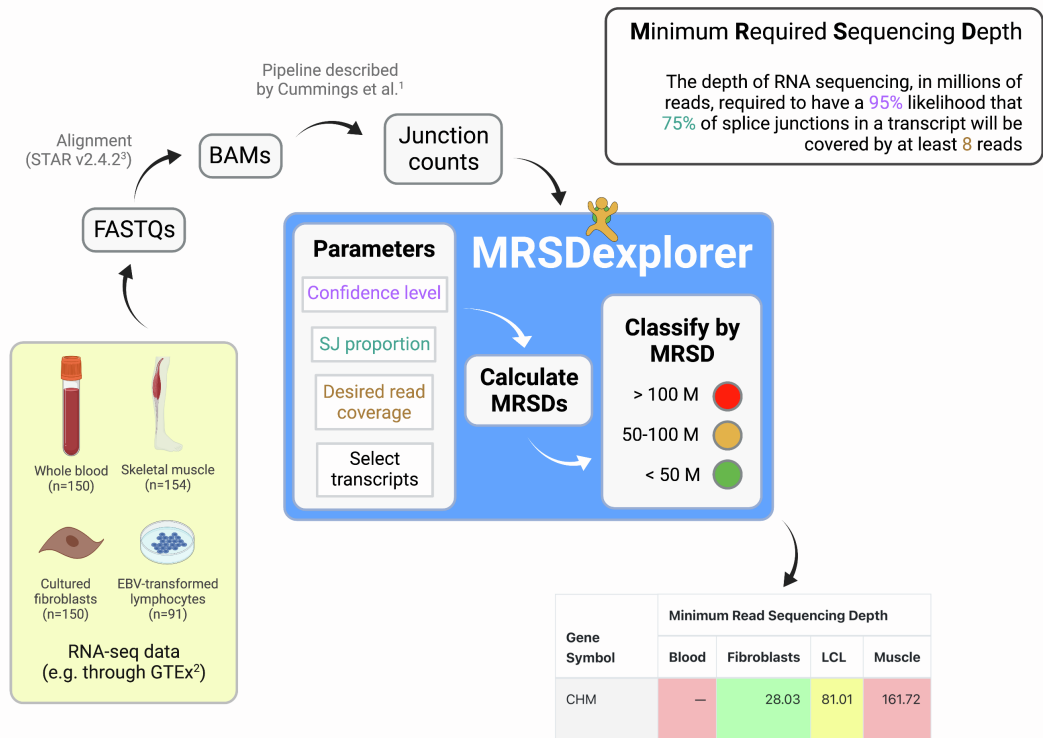

**Figure S2. Workflow for MRSD score generation.** Users can create their own MRSD scores using the code provided online at <https://github.com/mcgm-mrsd/mrsd-explorer>. Starting with a set of RNA-seq samples, reads are aligned and the split reads counted using an established pipeline. Then, using our bespoke Python scripts, users can generate their own predictive scores (using parameters of their choice) and classify transcripts according to the level of sequencing required to obtain the specified coverage. Alternatively, users are free to investigate pre-computed scores for all GENCODE v19 genes across four tissues (whole blood, skeletal muscle, cultured fibroblasts and lymphoblastoid cell lines, or LCLs) at our web portal: <http://mcgm-mrsd.github.io/>

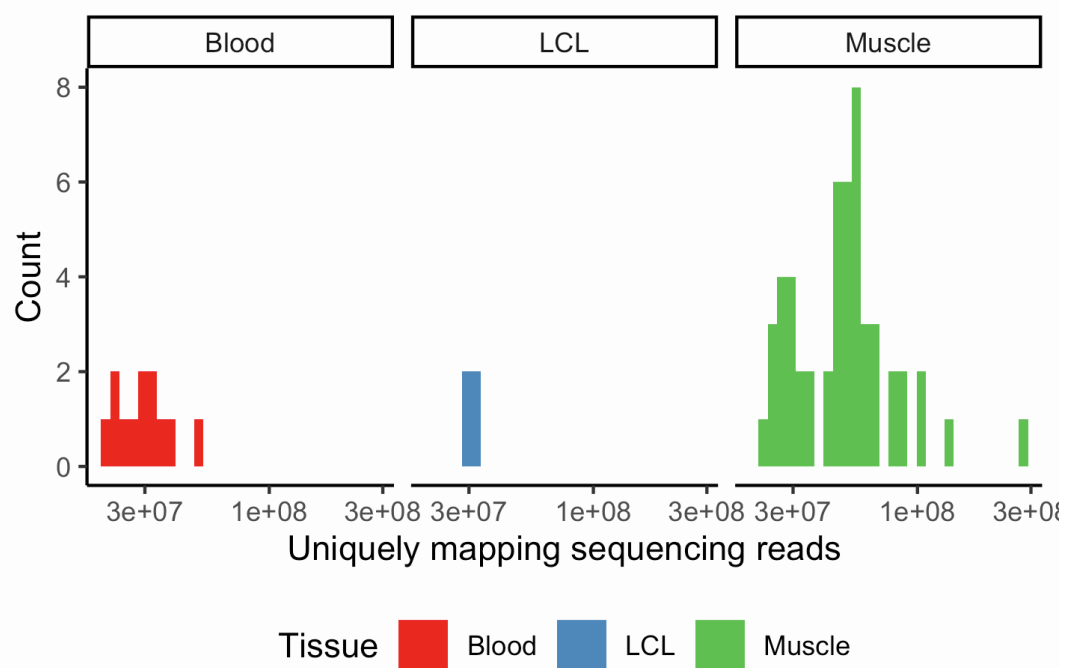

**Figure S3.** Sequencing depths of RNA-seq samples used for evaluation of MRSD model accuracy. Whole blood ( $n = 12$ ), LCL ( $n = 4$ ) and skeletal muscle ( $n = 52$ ) RNA-seq samples were derived from in-house or previously published data (3) for validation of the MRSD model efficacy. Sequencing depths across the three tissues ranged from 20.6-281.5 M uniquely mapping reads.

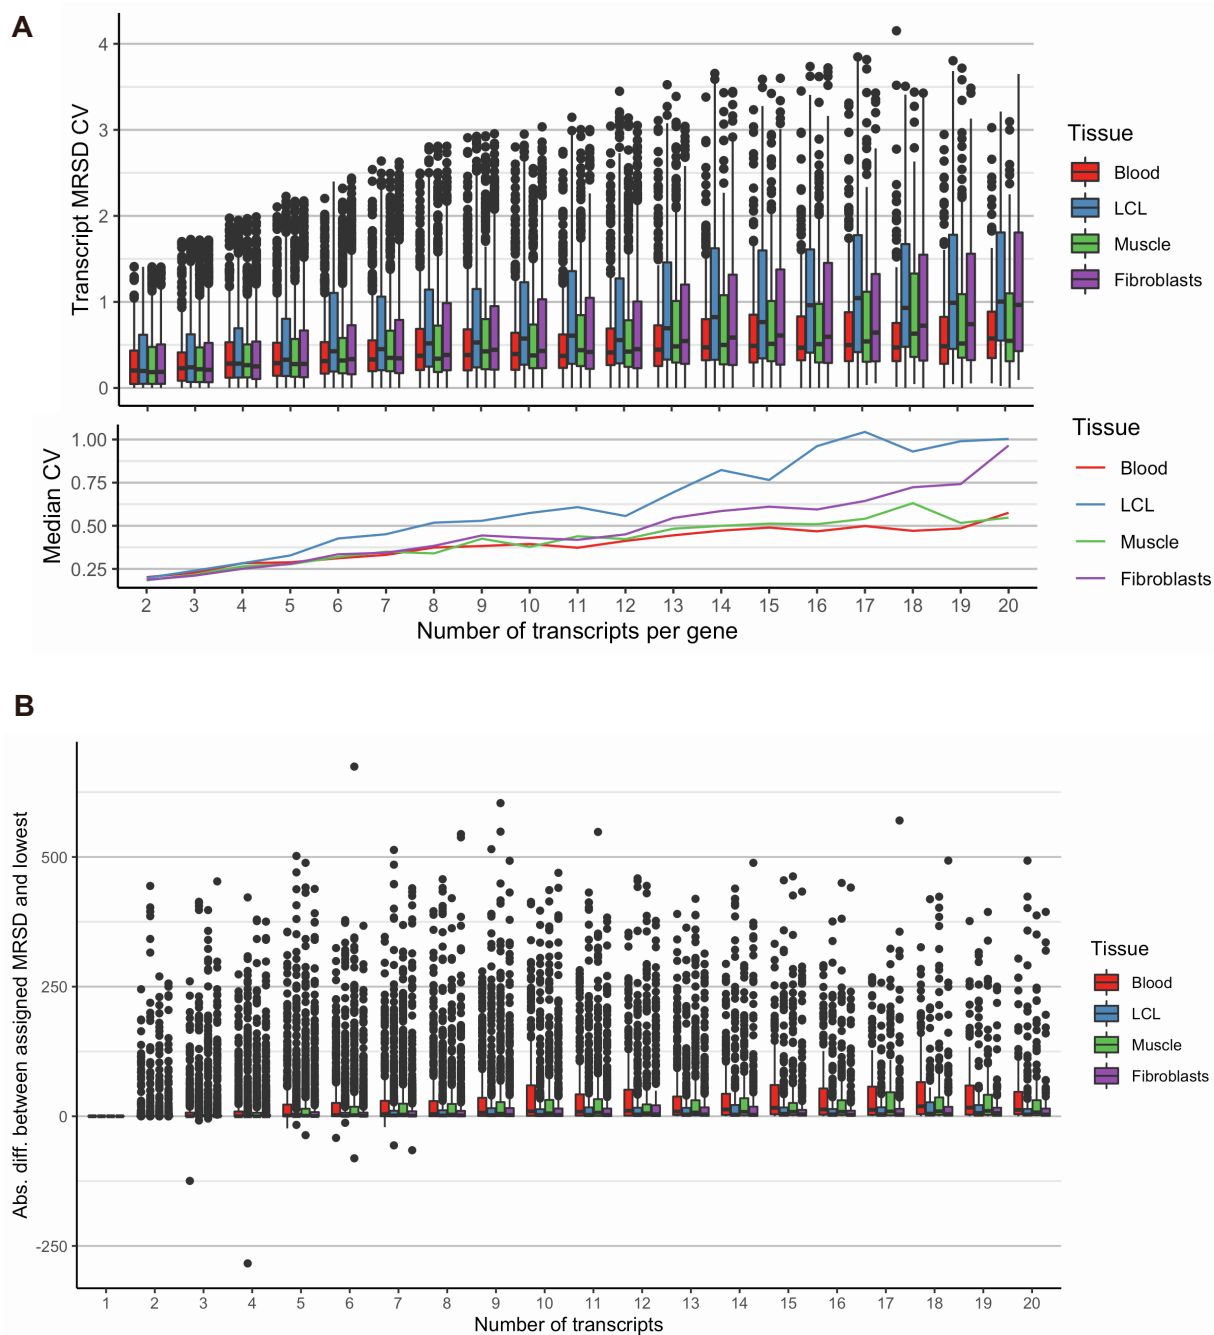

**Figure S4.** Extent of variability in MRSD scores among the different transcripts of individual genes. **(A)** Considering the MRSDs of genes with up to 20 MRSD-feasible GENCODE-annotated transcripts, we observed a median relative variability in MRSD (coefficient of variation, CV) across the four analysed tissues of 0.37-0.49. An increased number of transcripts per gene was associated with a small, gradual increase in CV. **(B)** Where our selected transcript generated an MRSD prediction, we observed only a small median difference in MRSD between this prediction and that of the lowest-MRSD transcript annotated for the same gene (median difference of 1.06-3.65 M reads).

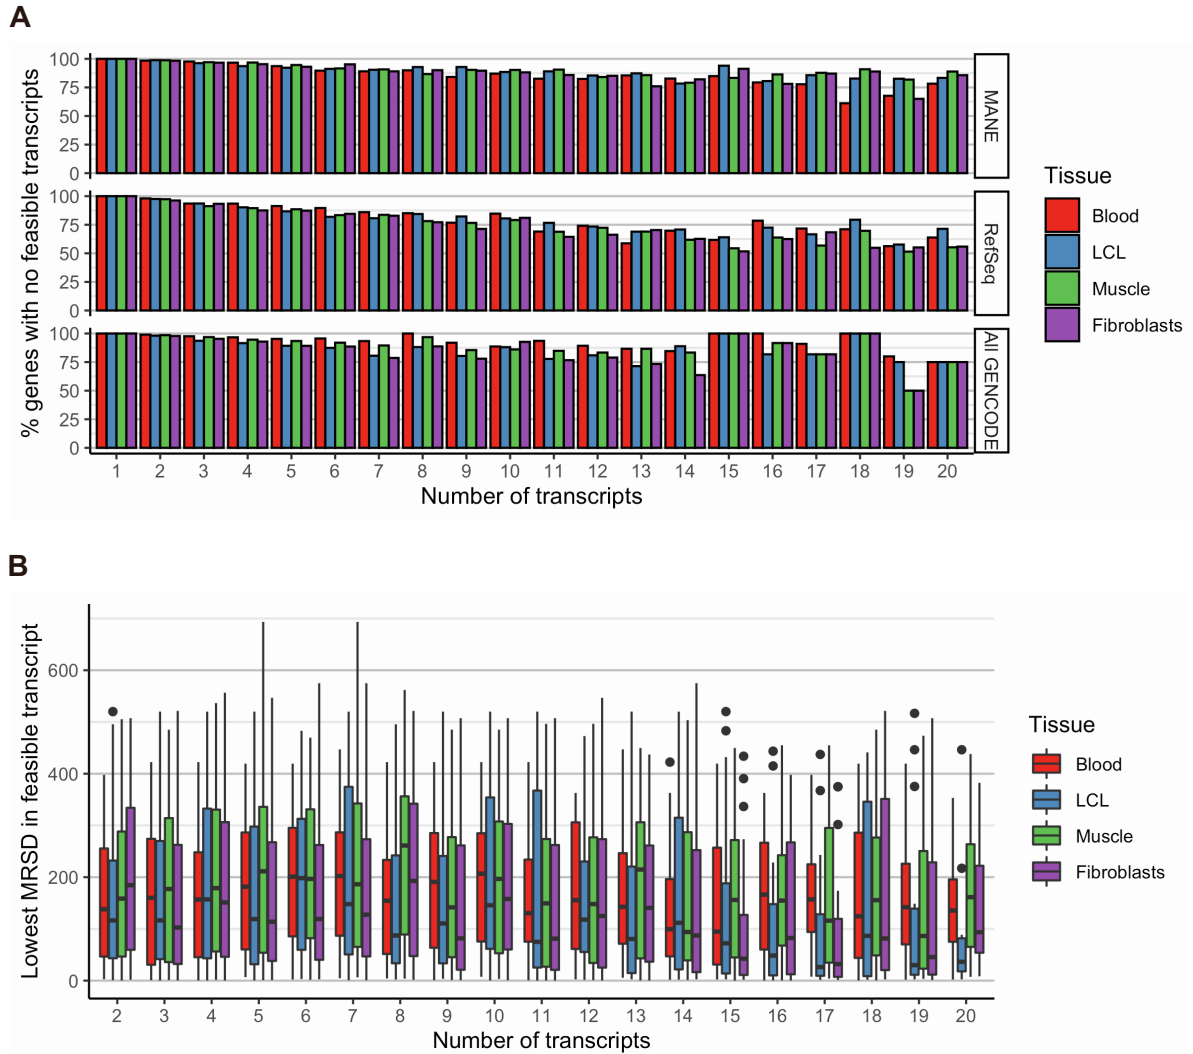

**Figure S5.** *Transcripts in genes deemed unfeasible through hierarchical selection are themselves likely to be unfeasible. (A)* Among genes for which our hierarchically selected transcript is deemed unfeasible through MRSD, 89.05-90.37% with multiple transcripts in GENCODE v19 are predicted to have no feasible transcripts. Of all the transcript tiers, unfeasible RefSeq composite transcripts are most likely to be assigned to genes with at least one feasible transcript. **(B)** In the remaining cases (in which an unfeasible gene is predicted to have at least one feasible transcript), the median MRSD for the lowest-MRSD transcript ranges from 108.59-157.78 M reads, depending on tissue choice.

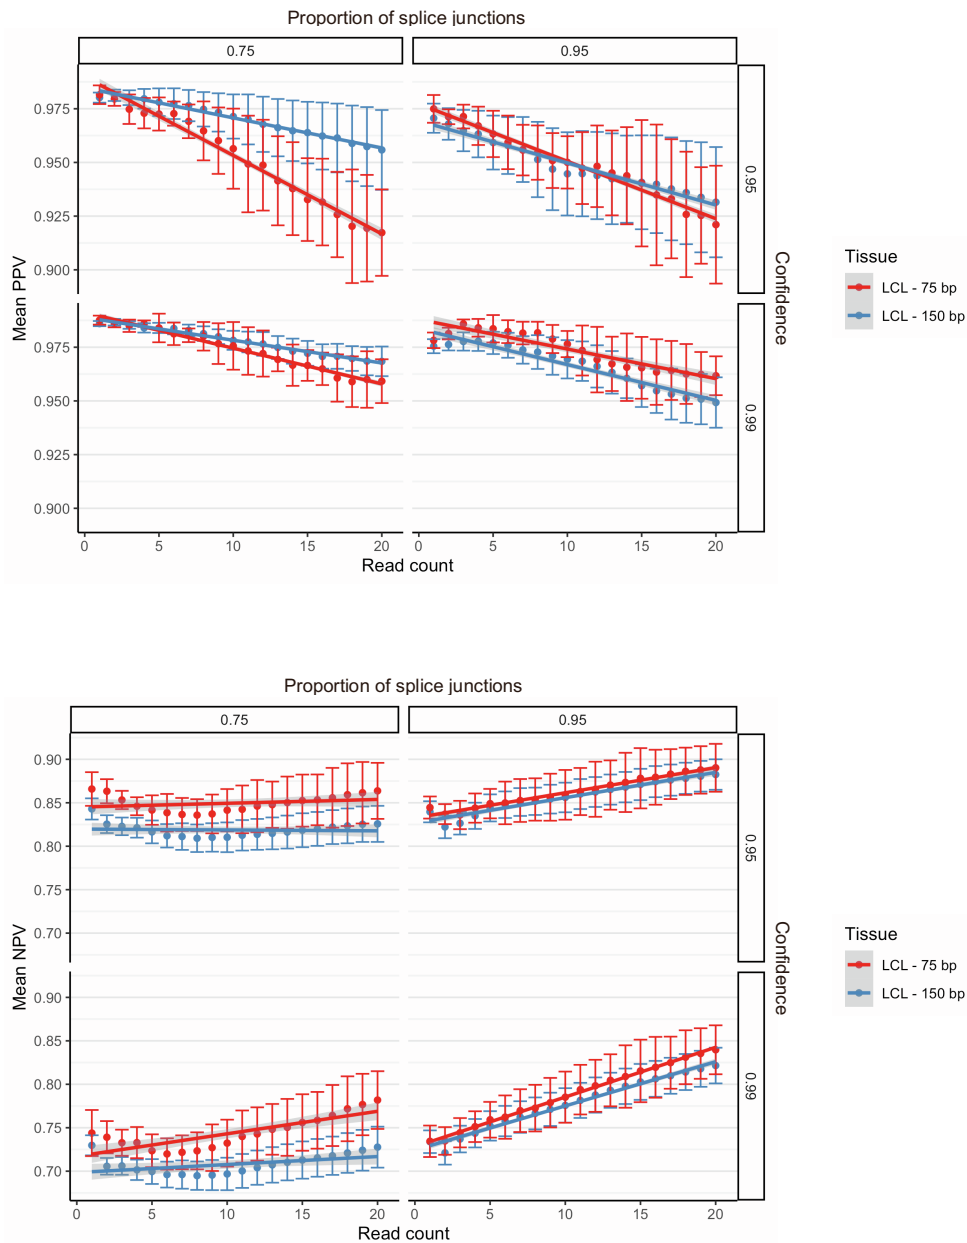

**Figure S6. Effect of varying sequencing read length on MRSD model performance.** Despite being derived from 75 bp paired end RNA-seq data, MRSD scores show similar performance when applied to 75 or 150 bp paired end read-based RNA-seq, both in terms of (top) PPV and (bottom) NPV. When specifying 75% splice junction coverage, MRSD PPV is generally higher when the model is applied to 150 bp read-based data. This likely reflects the fact that junctions predicted to be sufficiently covered by 75 bp reads will be more likely to be sufficiently covered by reads of greater length, and so positive predictions are more likely to hold true when applied to longer-read data. We also observe that NPV for 150 bp read datasets is lower than that for 75 bp across all 4 parameter combinations; conversely to PPV, this is possibly because transcripts not sufficiently covered by 75 bp reads are more likely to be sufficiently covered by 150 bp reads, thus making negative predictions less likely to hold true in longer-read data. In most cases, differences in model performance between 75 and 150 bp is low, suggesting MRSD may, in some cases, provide a suitable approximation of transcript coverage in RNA-seq datasets with read lengths different to those used to construct the model.

Figure S7

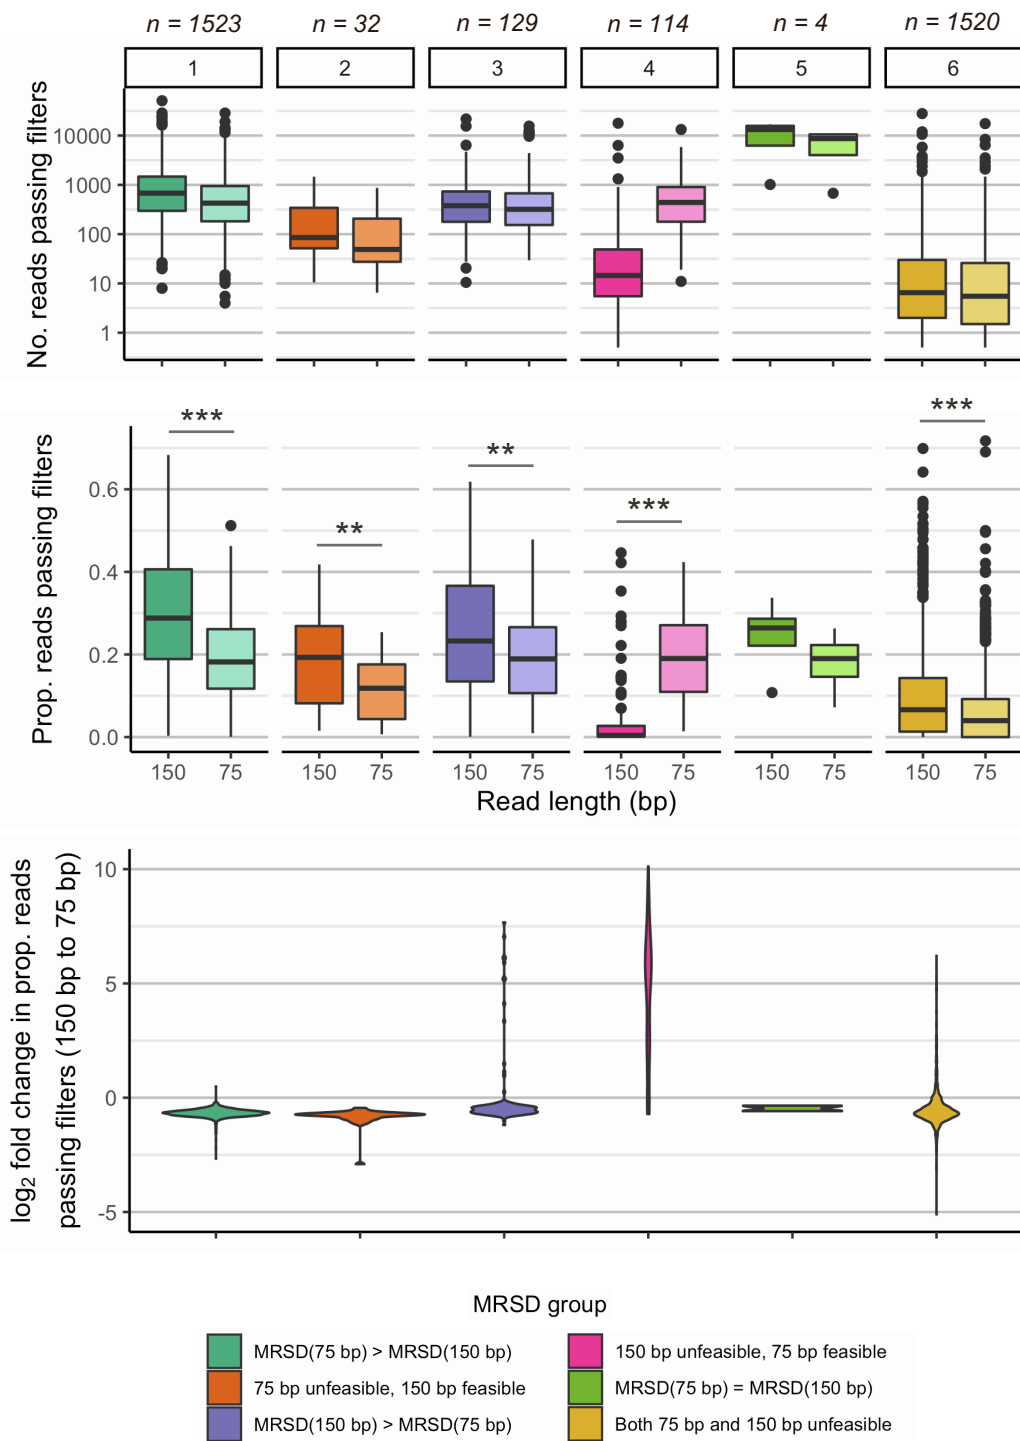

**Figure S7.** *MRSD scores are generally lower when derived from RNA-seq runs of longer read length.* MRSD predictions generated from 20 LCL-based 150 bp RNA sequencing runs were compared against those generated following trimming of the same reads to a maximum of 75 bp. For 45.8% (1520/3322) of disease-associated genes, coverage was too poor to generate an MRSD score regardless of read length (group 6), while MRSDs could be generated but remained the same regardless of read length for just 4/3322 (0.12%) genes (group 5). Intuitively, of the 54.1% (1798/3322) of genes for which at least one dataset allowed MRSD generation, a higher MRSD was observed in the 75 bp dataset for 86.5% (1555/1798, groups 1 and 2). However, for the remaining 13.5% of genes (243/1798, groups 3 and 4), a lower MRSD score was generated using the 75 bp dataset than the 150 bp dataset. For many of these genes, it was determined that a shortening of the reads actually improved their quality to the extent that they were more likely to pass the enforced quality filters – namely, that a mapping event must be the primary alignment, that the read must map successfully (i.e. must have a mapping quality of 60) and that the read must be a split read. We observed that in group 4, comprising genes for which MRSD generation is unfeasible using the 150 bp dataset but feasible using the 75 bp dataset, there was a median 36.8-fold increase in the number of reads passing these read filters following trimming (bottom). Further work is needed to investigate alternative causes of this counter-intuitive pattern, and to determine whether the discarding of the longer reads represents an artefactual drawback to the read filtering process, or an effective way to filter reads for quality that is missed using shorter reads.

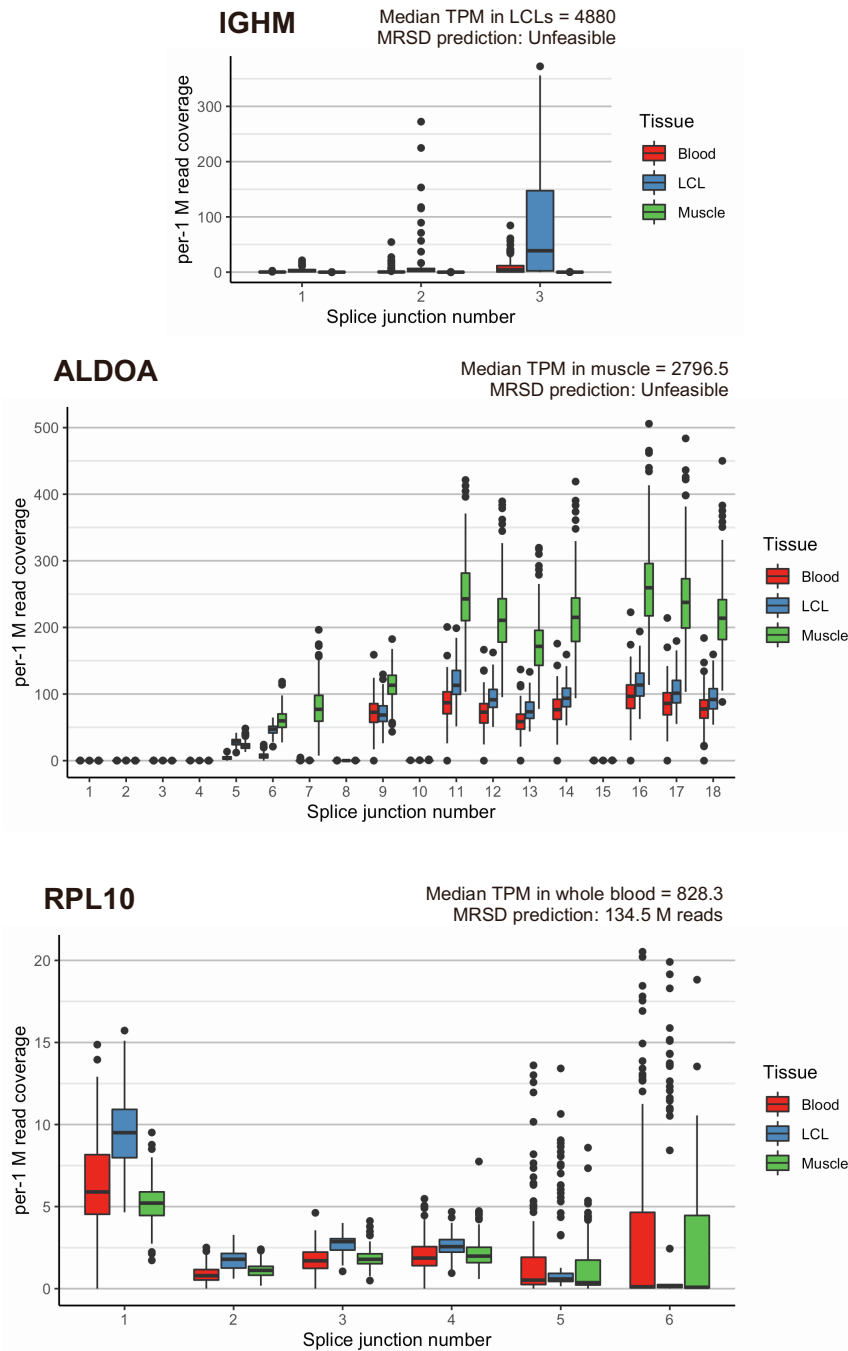

**Figure S8.** Evidence for 3' sequence bias confounding the use of TPM as a guiding RNA-seq metric. Analyzing the number of reads (per 1 M uniquely mapping input reads) mapping to individual splice junctions within three genes with substantial TPM-MRSD discrepancy demonstrates that highly expressed genes may exhibit biased coverage of splice junctions. For IGHM (top) and ALDOA (middle) in LCLs and muscle, respectively, a sufficient proportion of junctions towards the 3' end of the transcript have no read support in a sufficient number of patients, resulting in an MRSD prediction of "unfeasible", despite high coverage of other junctions within the same transcript. Coverage of the final two splice junctions in RPL10 (bottom) in LCL-based RNA-seq data is low but not non-zero in many patients, giving a feasible but high MRSD prediction. In some cases, this bias may result from artefacts of library preparation, or may possible reflect genuine isoform shifts in the given tissue. Higher splice junction numbers represent junctions closer to the 3' end of transcripts.



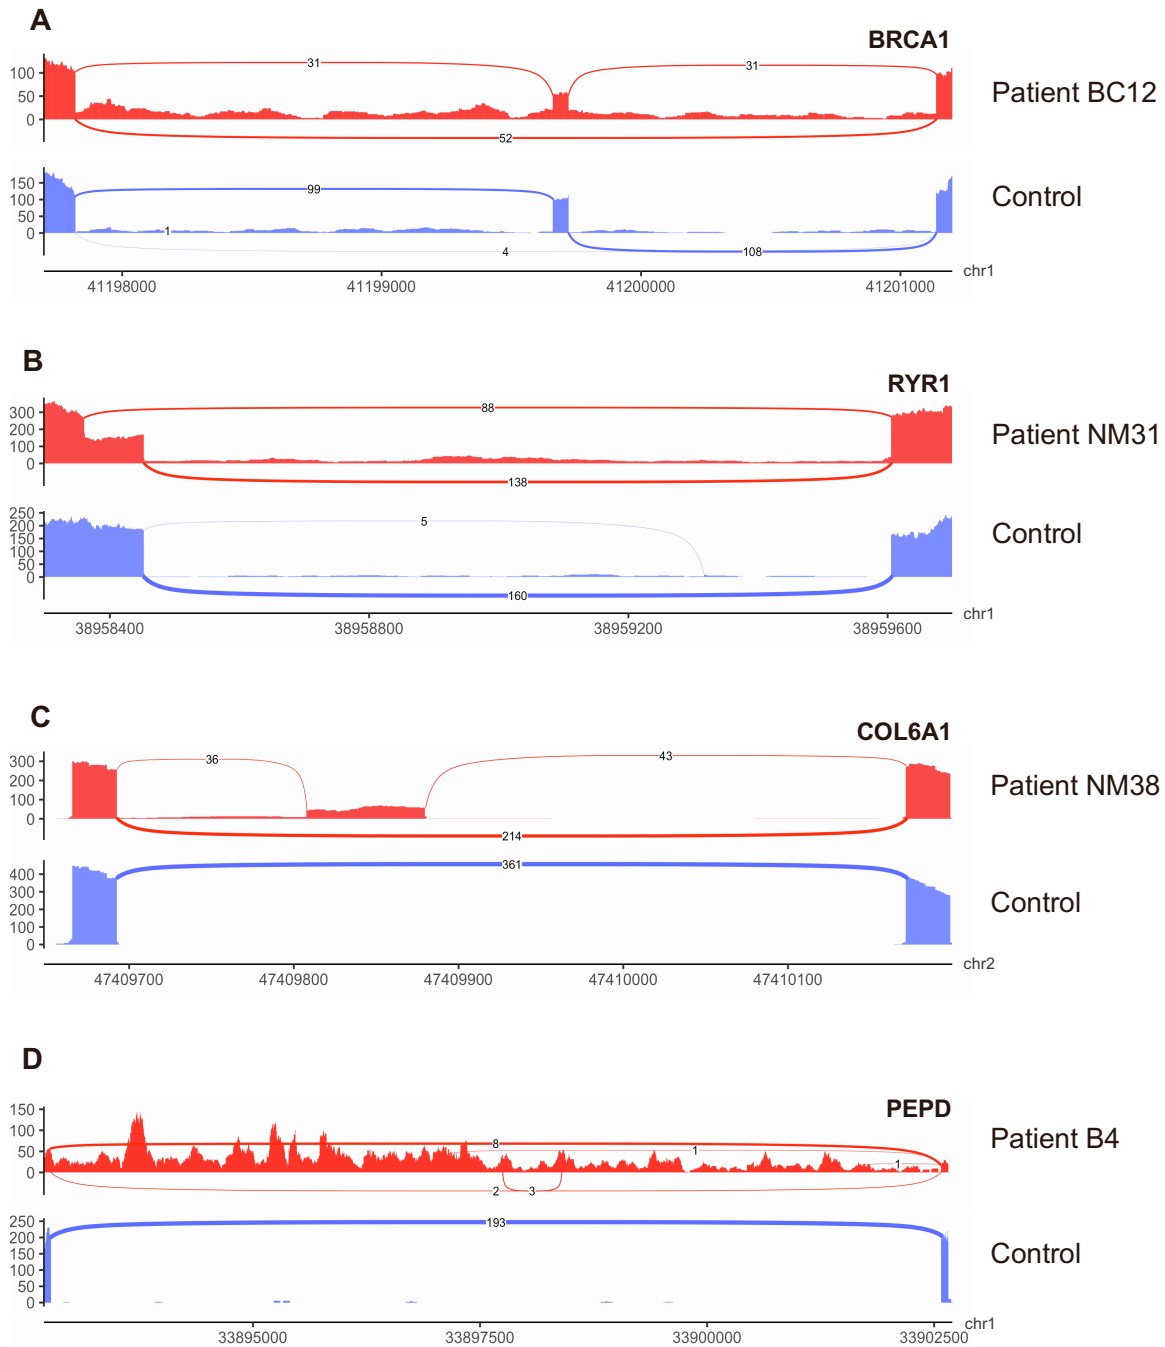

**Figure S9.** Exemplar events identified during pathogenic splice event analysis. Selected Sashimi plots for (A) exon skipping, (B) exonic splice gain, (C) pseudoexonization and (D) intron retention events identified as the cause of disease in our patient datasets. The presence of aberrant splice junctions with outlying event metrics allowed flagging of these as potentially pathogenic. For (D), the intron retention event was identified from the 2 reads supporting usage of an extremely weak alternative splice acceptor four bases downstream of the abrogated canonical acceptor; however, in the absence of any aberrant splicing events, intron retention events are more difficult to identify from RNA-seq data using current bioinformatics pipelines.

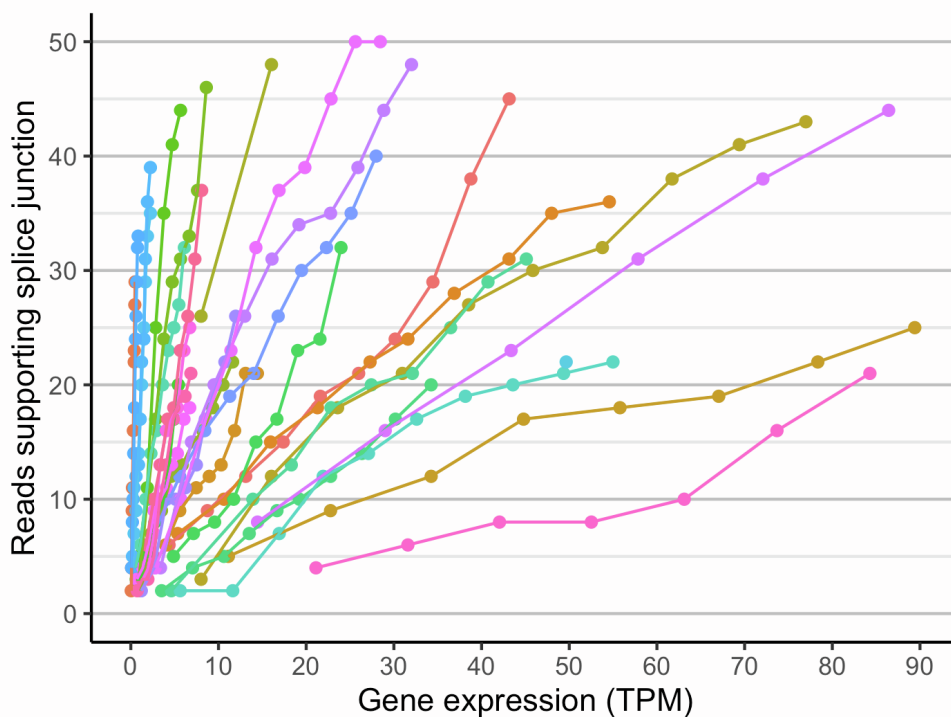

**Figure S10.** *Relative gene expression level does not reflect the raw read coverage of transcript splice junctions.* When simulating decreased gene expression by downsampling reads in genes containing novel splicing events identified in upstream analysis, it emerged that expression of a gene (in transcripts per million, TPM) does not directly correlate with the number of reads supporting splice junctions in that gene. Among the events supported by 8 reads, for example, gene expression ranged from 0.17-52 TPM. This may be accounted for by variation in the proportion of transcripts containing the event, variation in the coverage across the length of a transcript (as shown in Figure S4), or variation in the depth to which a sample has been sequenced. Thus, when specifying a metric threshold above which we expect splice aberration to be observable, relative expression level may not appropriately represent expected read support. Axes are limited for ease of visualization.

**Figure S11.** Pairwise comparisons, by tissue, of predicted MRSD scores for PanelApp disease genes.

**A) MRSD predictions in muscle vs. blood**

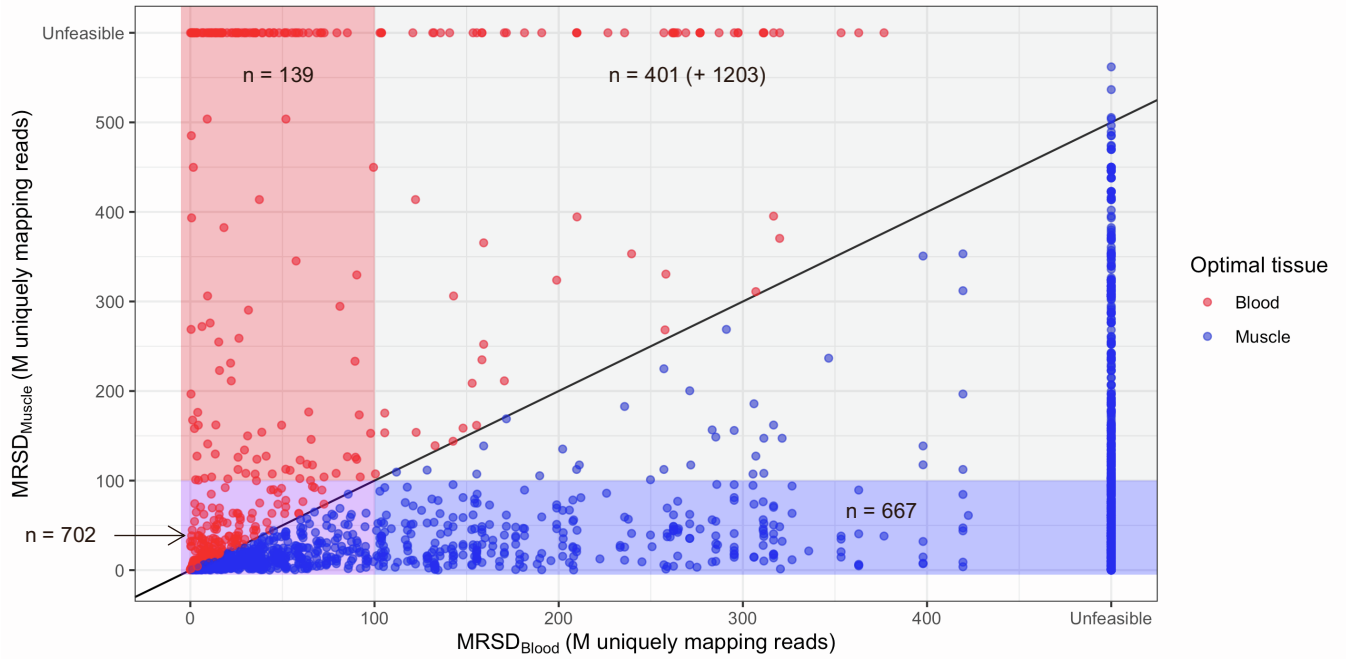

**B) MRSD predictions in LCLs vs. muscle**

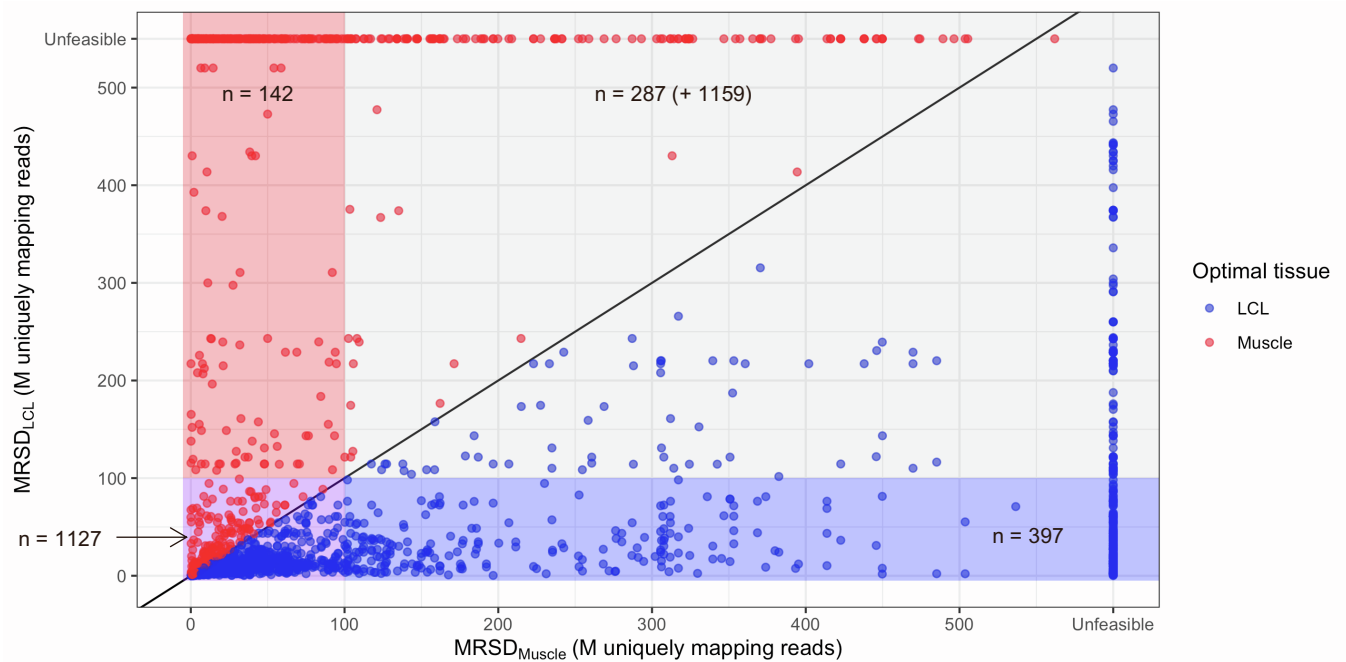

**Figure S12.** Proportion of low-MRSD genes per tissue for all PanelApp panels, ordered by panel size.

**A) Low-MRSD gene proportions for large panels (> 50 genes)**

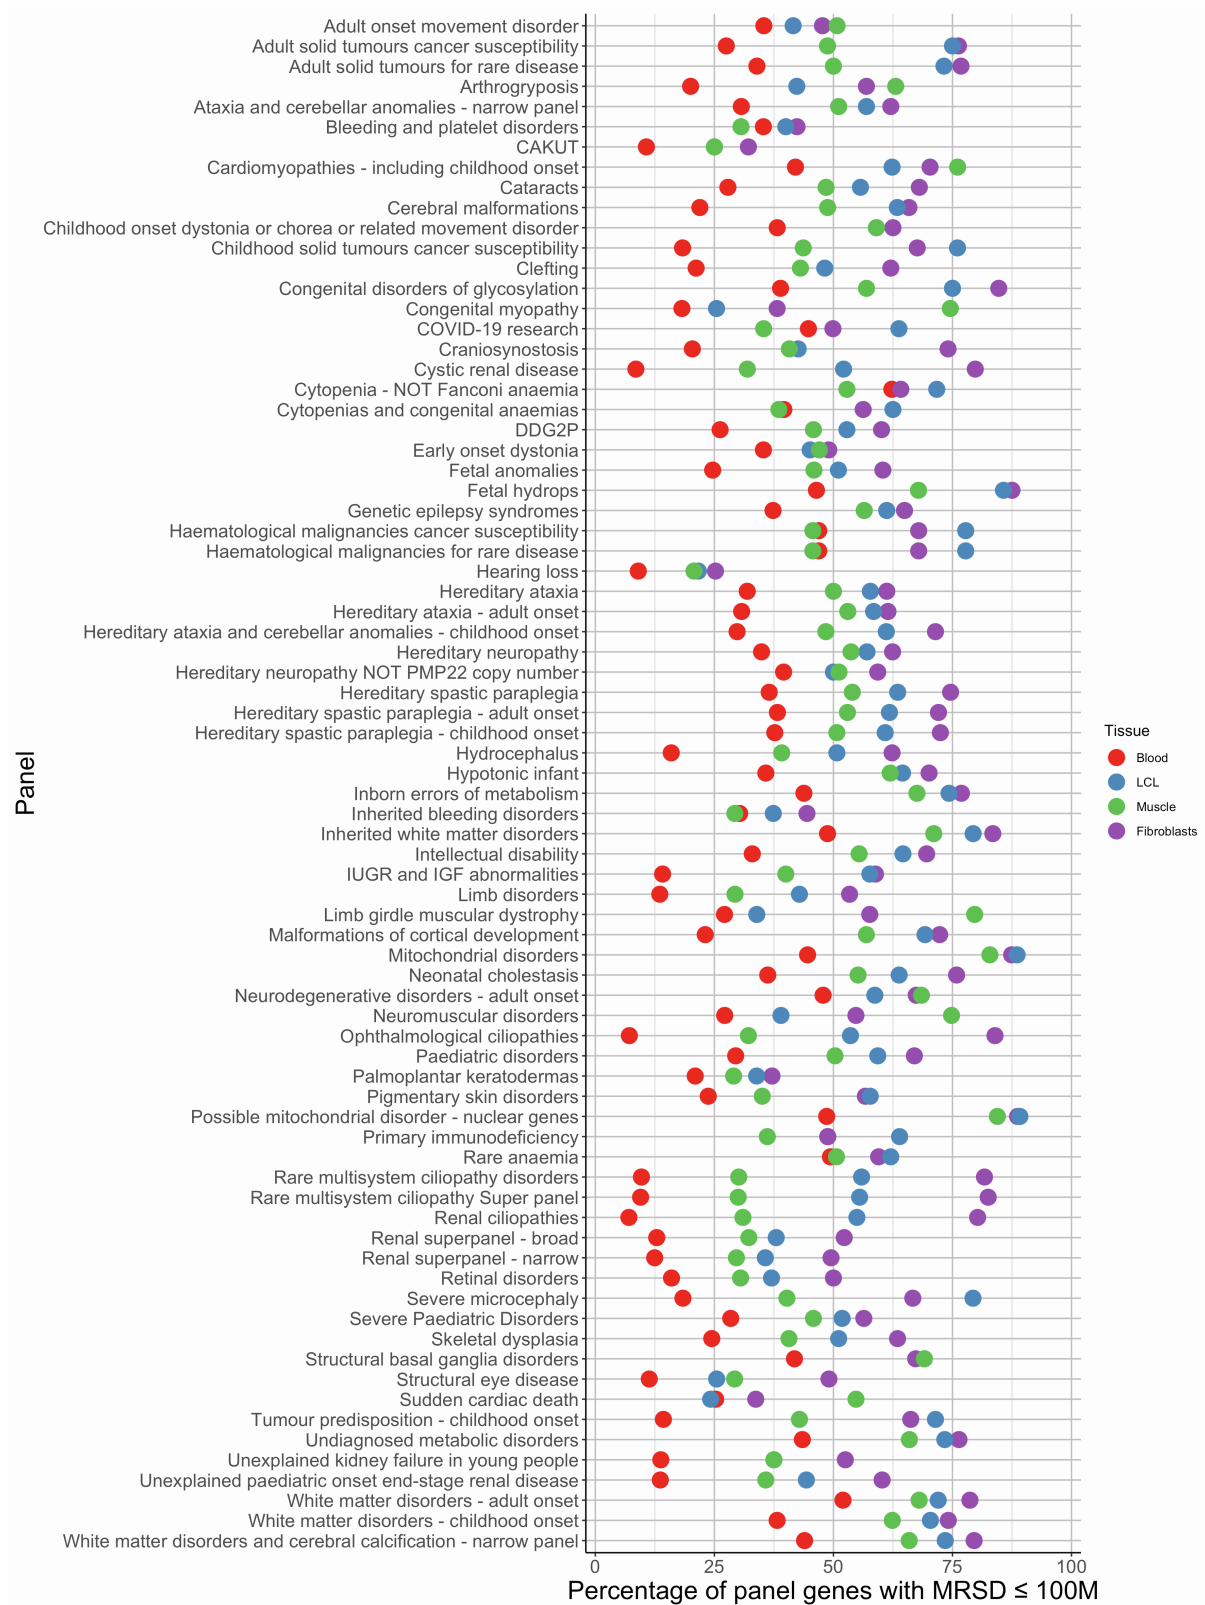

## B) Low-MRSD gene proportions for medium panels (21-50 genes)

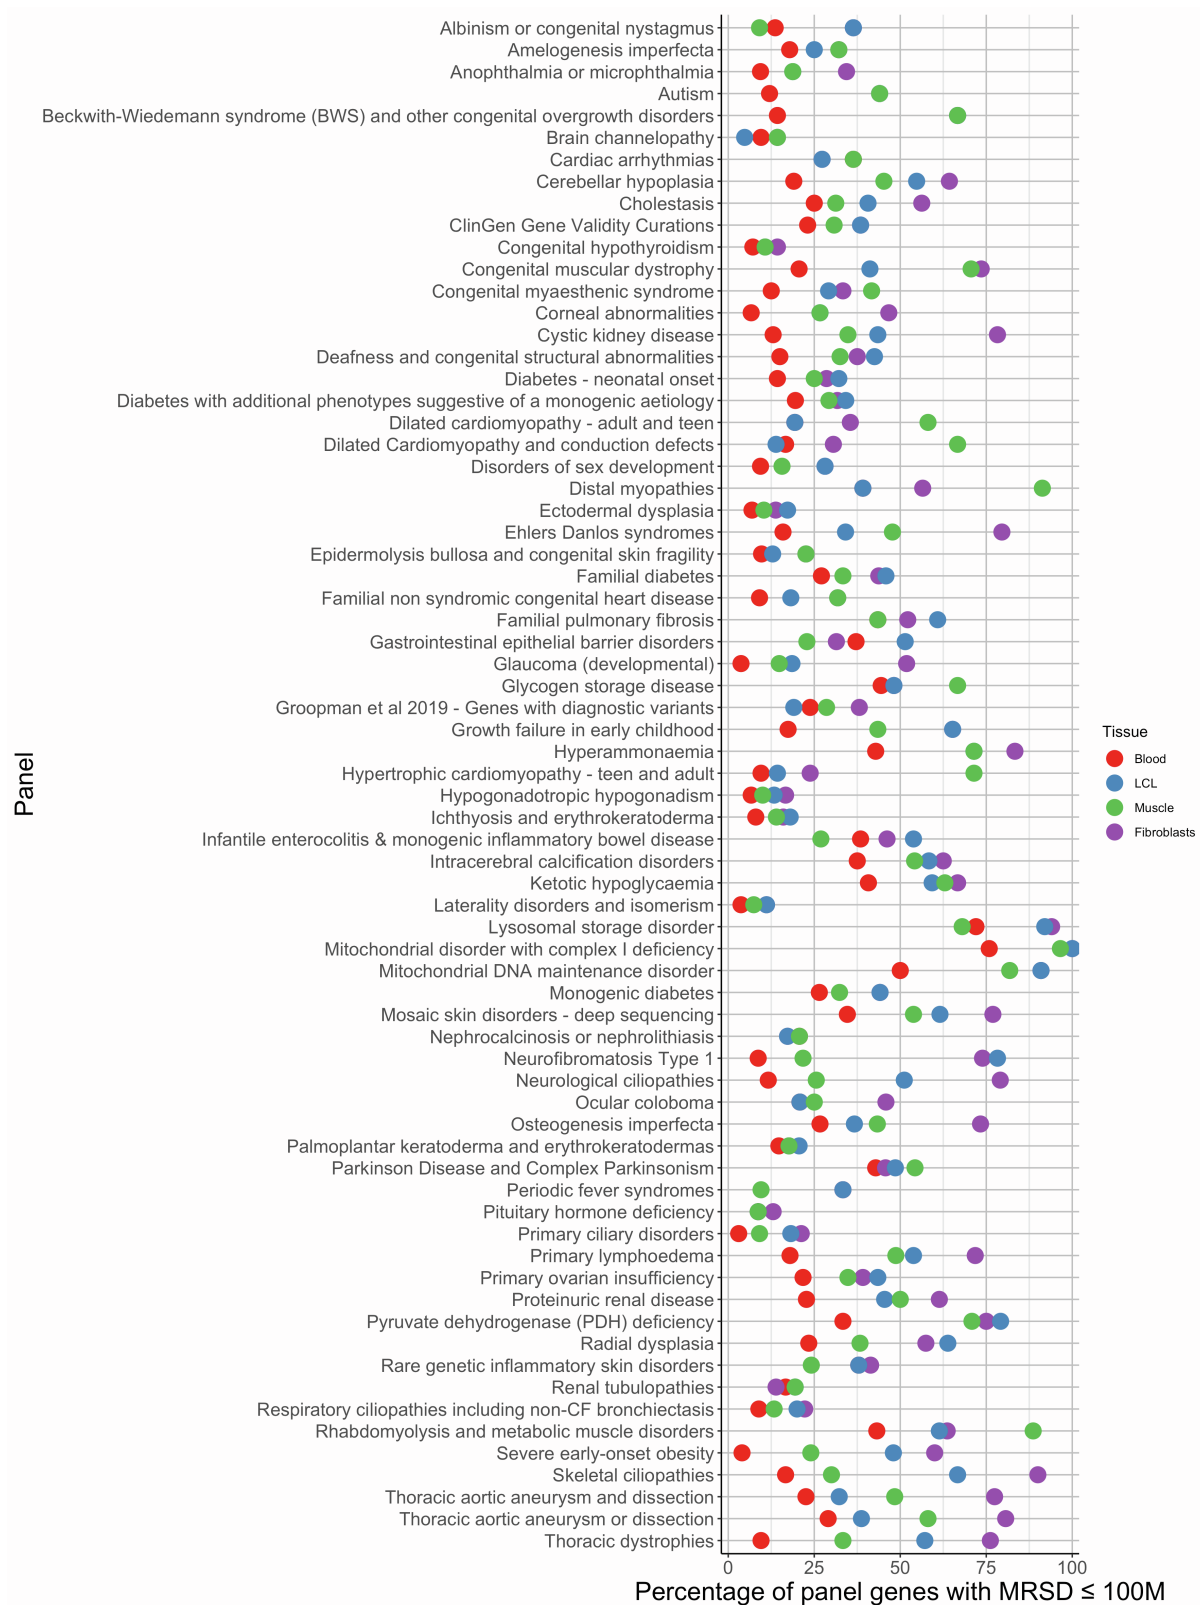

### C) Low-MRSD proportions for small panels (11-20 genes)

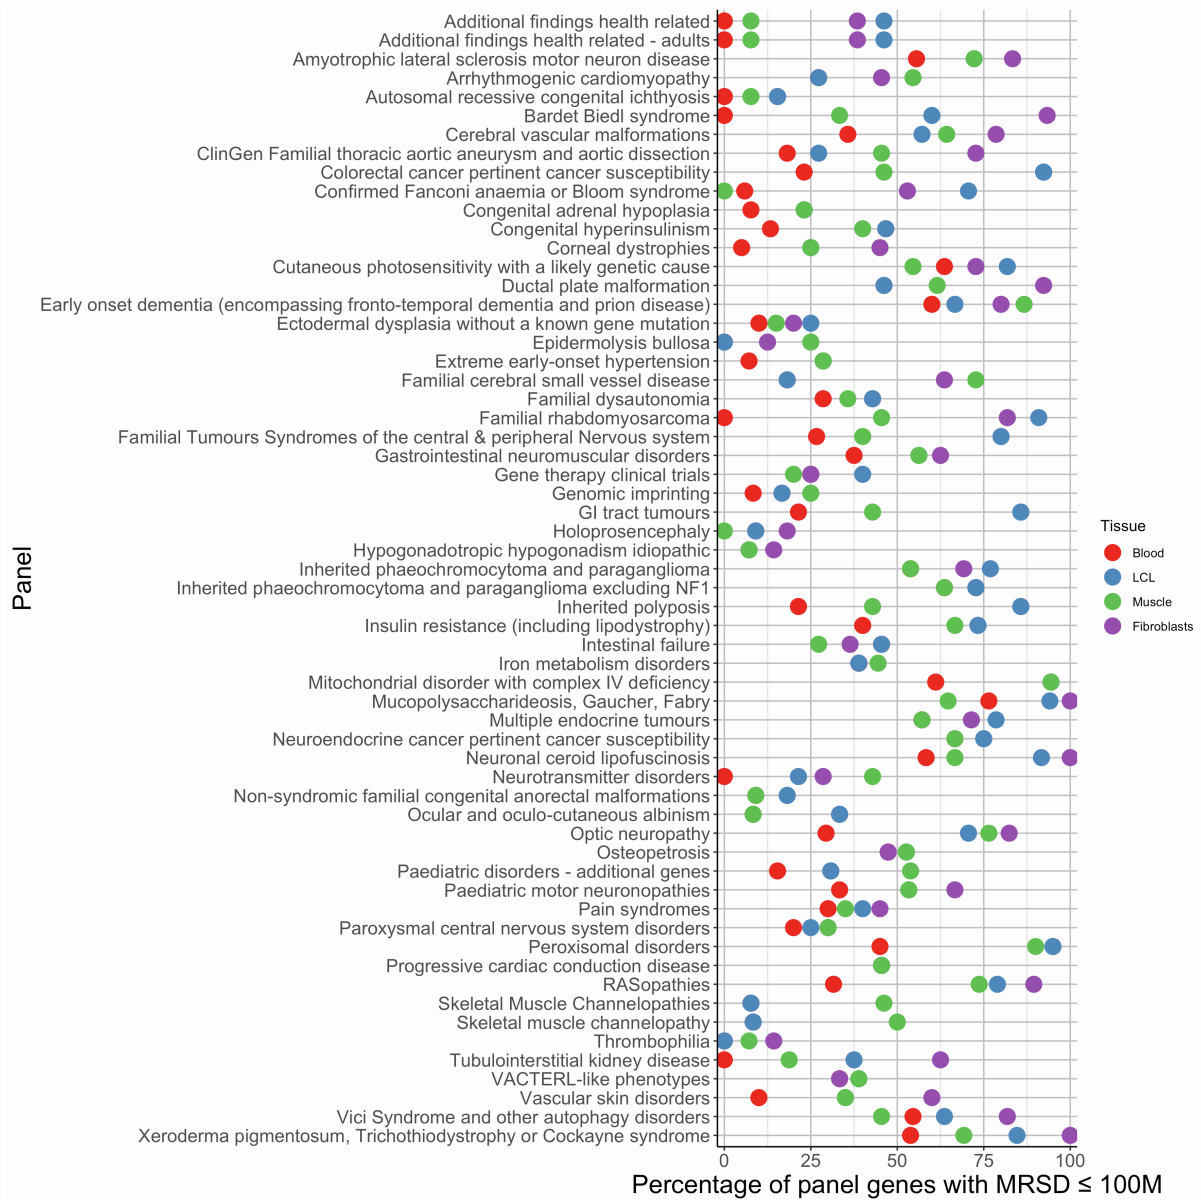

## D) Low-MRSD gene proportions for very small panels ( $\leq 10$ genes)

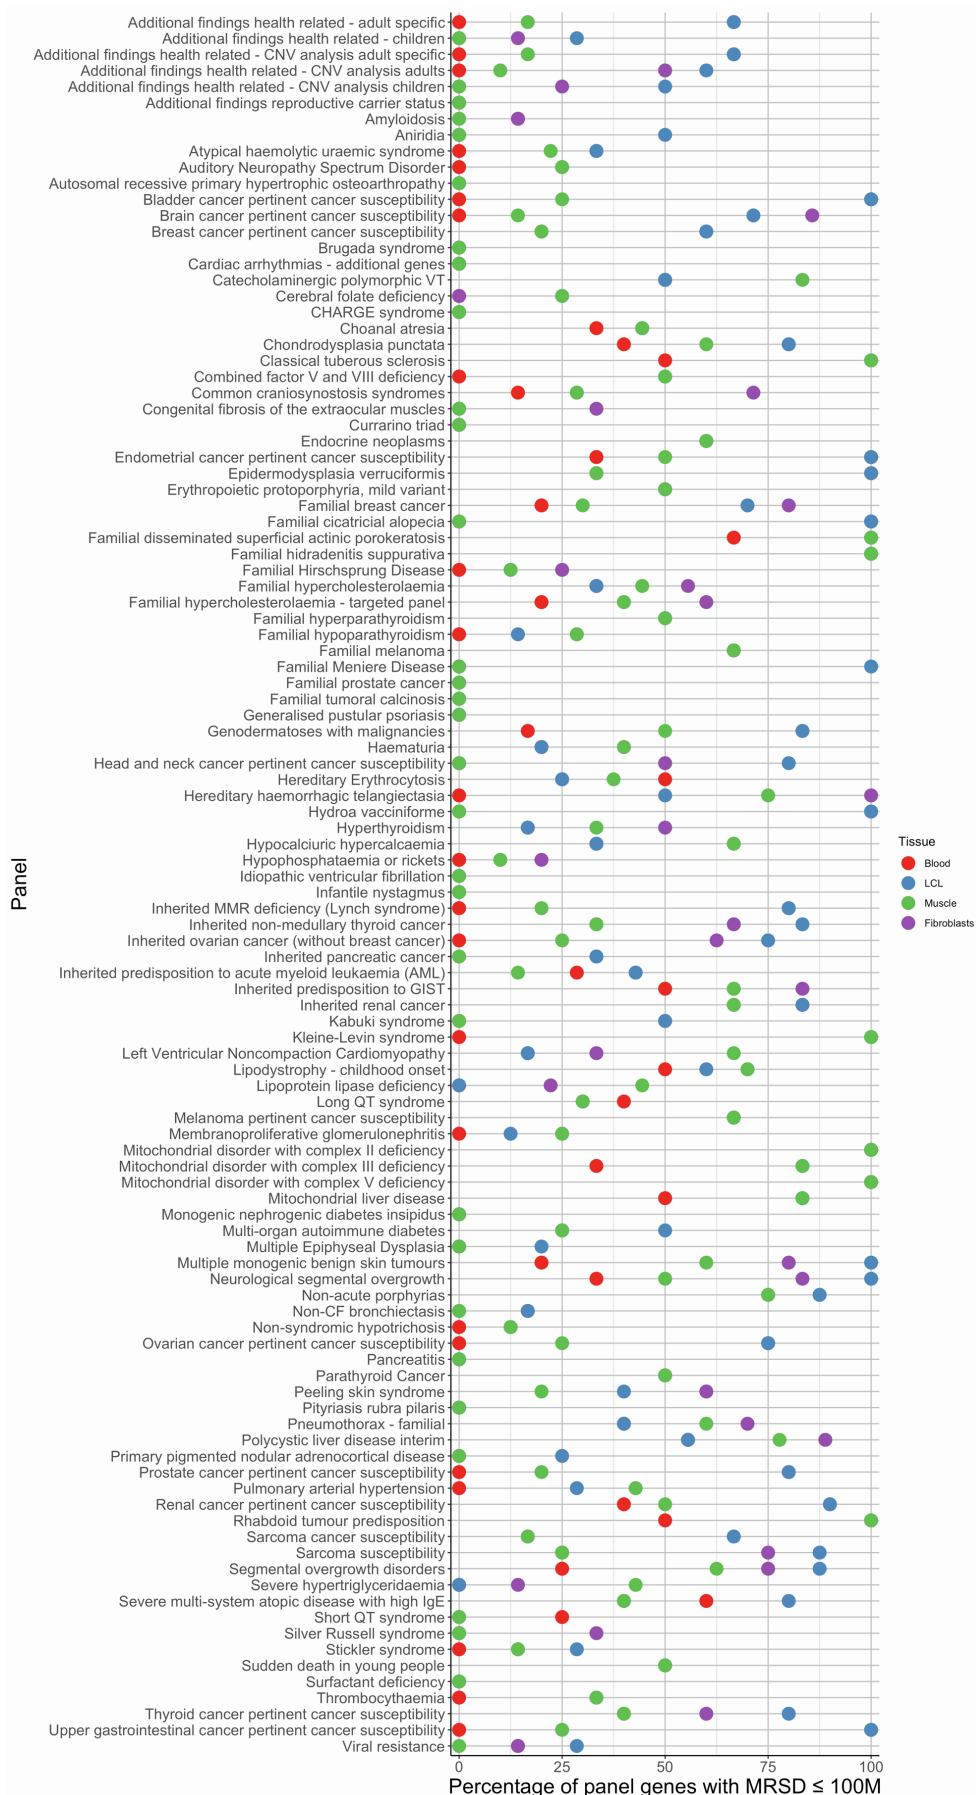



**Figure S13.** Proportion of low-MRSD genes per tissue for all PanelApp panels, ordered alphabetically by panel name.

**A) Low-MRSD gene proportions for panels named A-E**

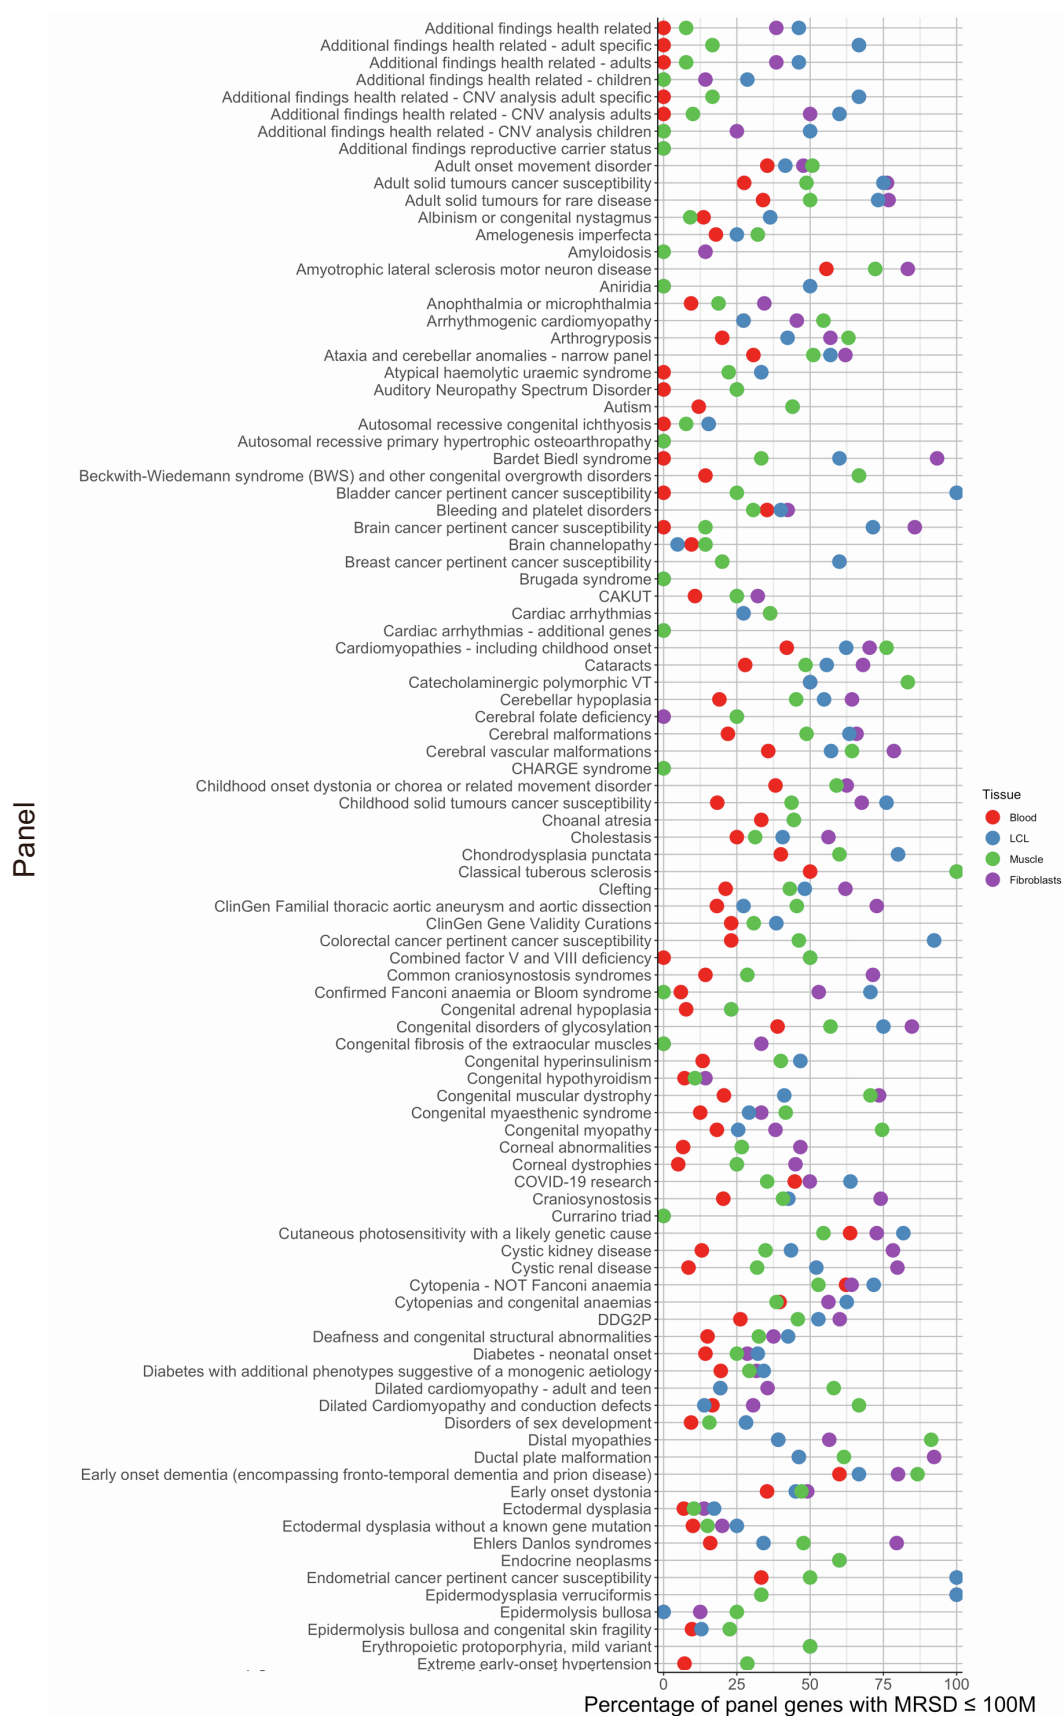



## B) Low-MRSD proportions for panels named F-L

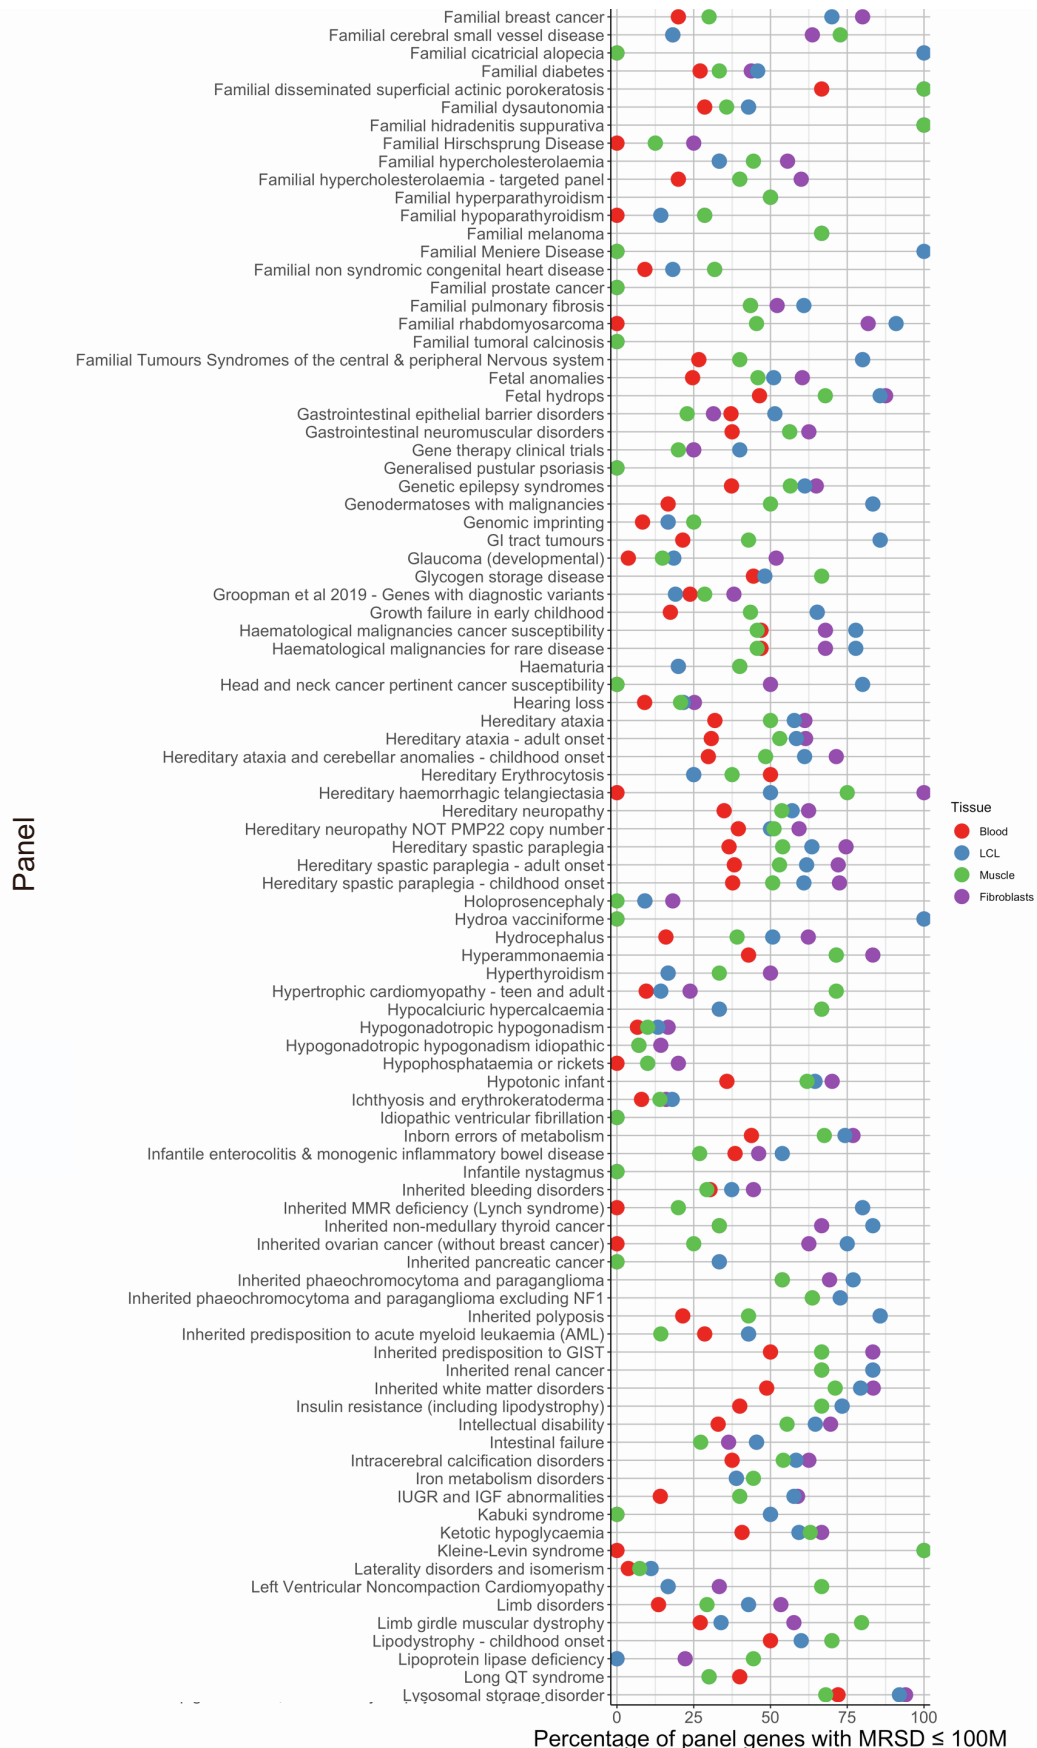

### C) Low-MRSD gene proportions for panels named M-R

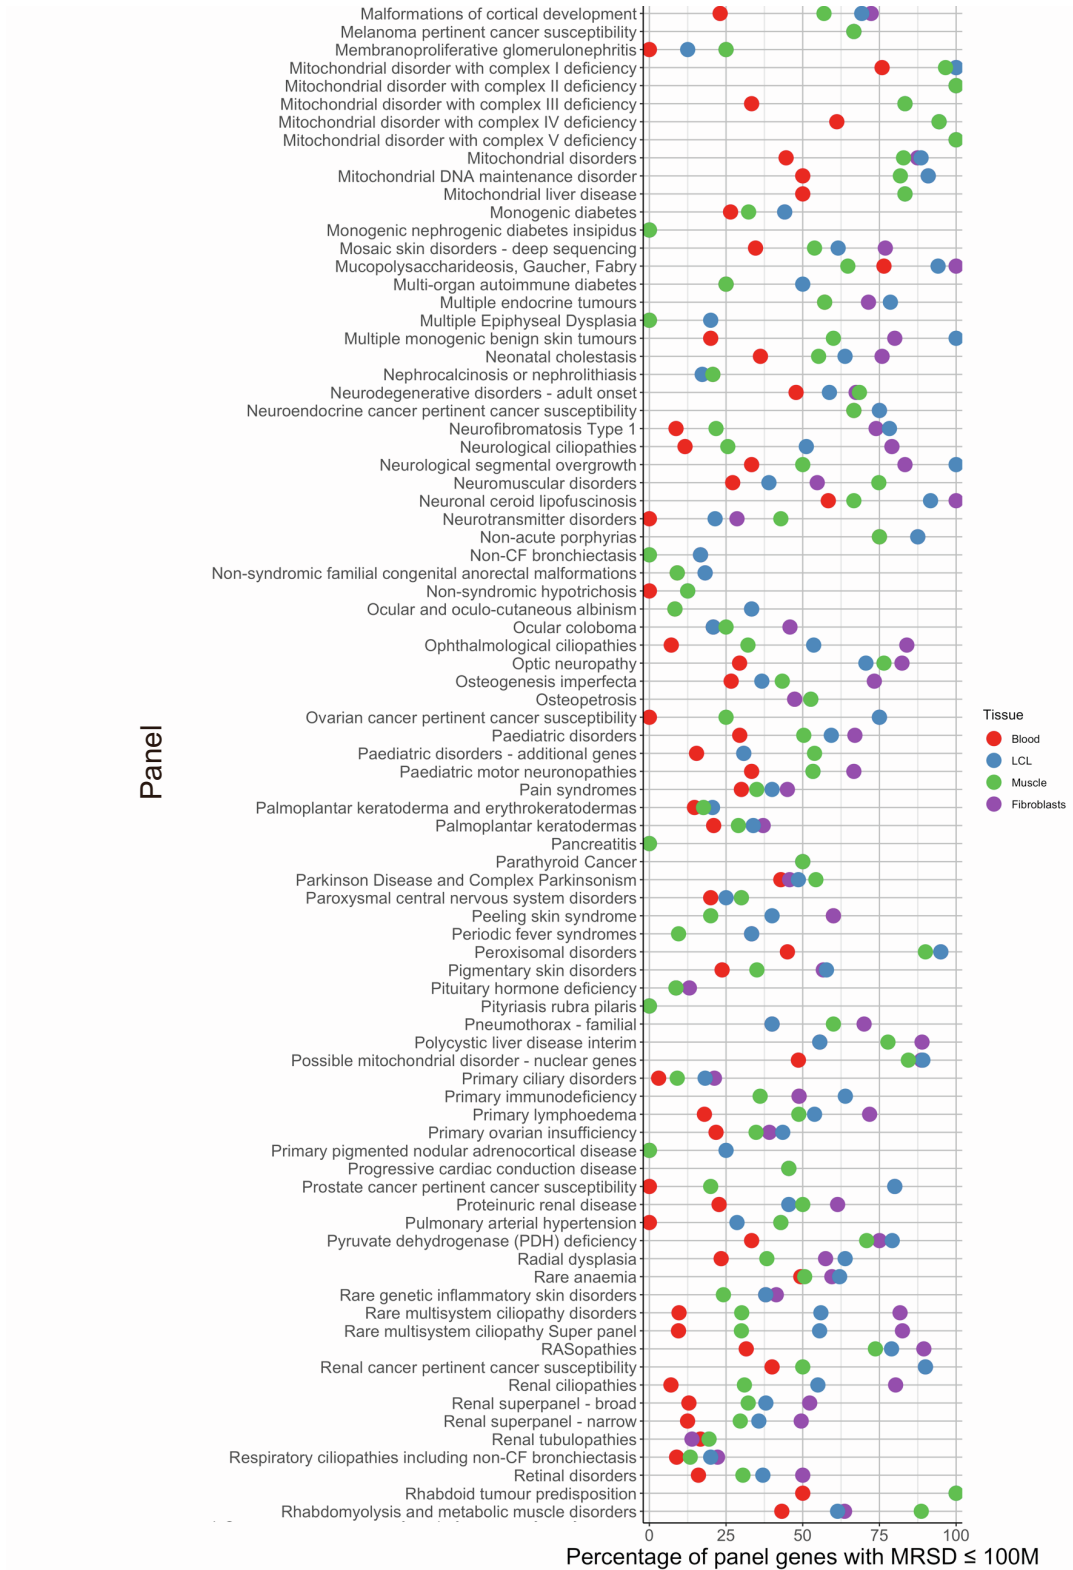

## D) Low-MRSD gene proportions for panels named S-X

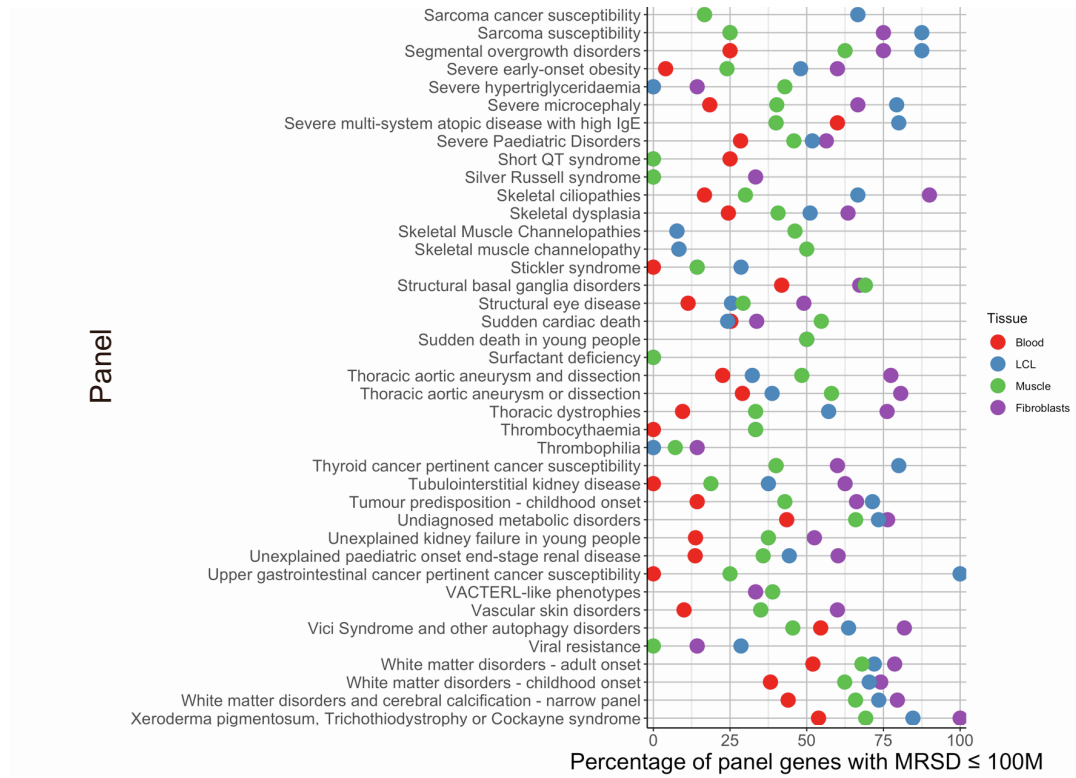

### 10 reads

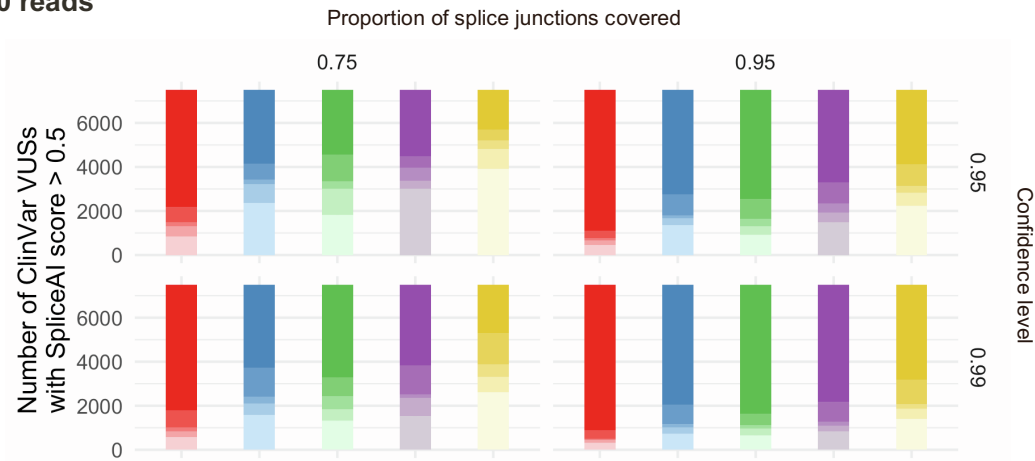

### 20 reads

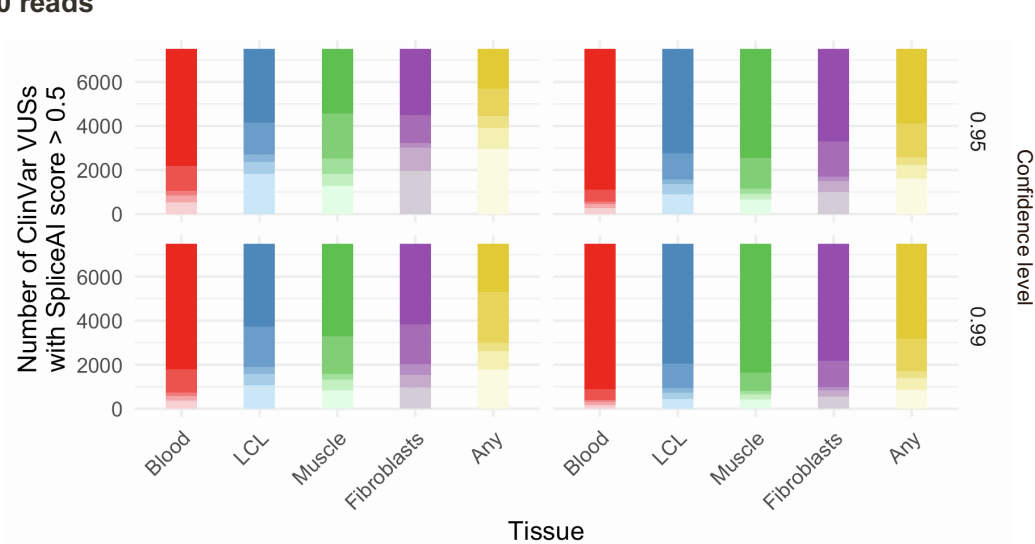

**Figure S14.** Increasing specified read coverage reduces the number of ClinVar variants that can be analyzed. Similarly to Figure 7a (main text), we generated MRSD scores for genes harboring predicted splice-impacting ClinVar variants (SpliceAI score  $\geq 0.5$  (4)) using more stringent read coverage parameters (10 and 20 reads). We observed only a small reduction in the number of ClinVar variants in low-MRSD genes when specifying 10 reads (24.9-64.0% dependent on parameters). Specifying 20 read coverage, however, dramatically reduces the percentage of ClinVar variants in low-MRSD genes to 18.7-52.0%.

## 10 reads

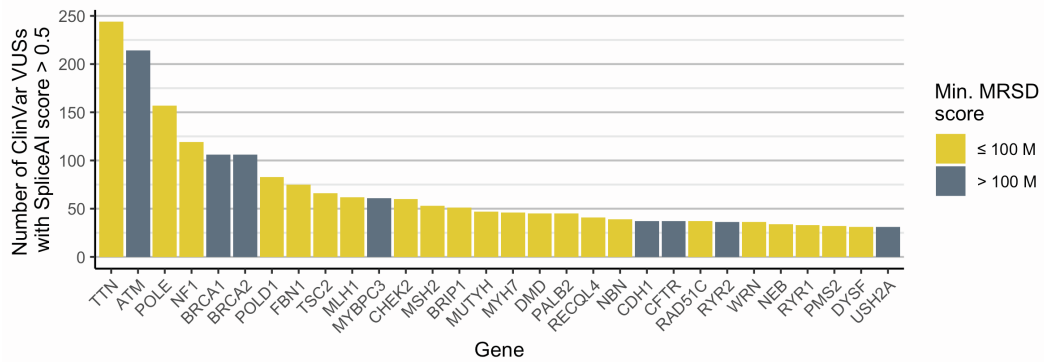

## 20 reads

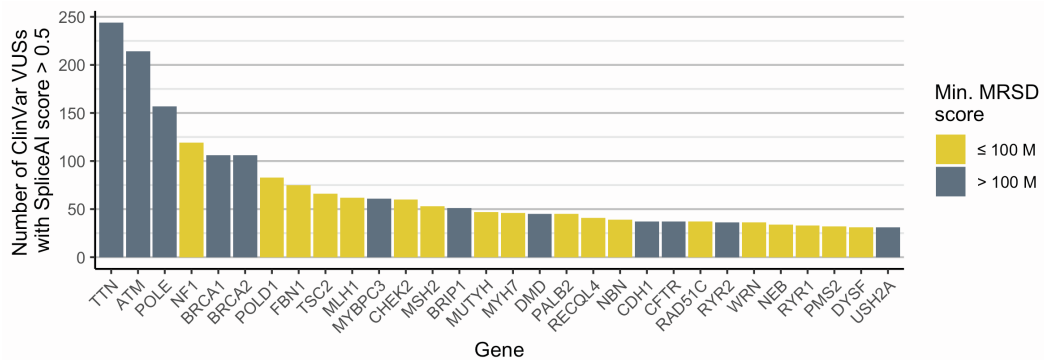

**Figure S15.** Increasing specified read count removes highly VUS-prone genes from the scope of analysis. Similarly to Figure 7b, we looked among the 30 genes harboring the most predicted splice-impacting ClinVar variants and considered how many were low-MRSD in at least one of the four investigated tissues when specifying increasing levels of read coverage. Only one extra gene, ATM, becomes ostensibly high-MRSD when specifying a 10-read coverage parameter when compared with the 8-read coverage data (Figure 7b). However, by specifying a 20-read level of coverage, a further four genes are removed from the scope of analysis, leaving 18/30 (60%) still considered low-MRSD.

| Variant (HGVSg)         | Gene    | Source of RNA   | Phenotype                              | TPM    | MRSD (M reads) |
|-------------------------|---------|-----------------|----------------------------------------|--------|----------------|
| chr2:152,355,017G>T     | NEB     |                 | Nemaline myopathy                      | 857.9  | 9.83           |
| chr2:152,389,953A>C     |         |                 |                                        |        |                |
| chr2:152,544,805C>T     | DMD     |                 | Duchenne muscular dystrophy            | 24.84  | 79.4           |
| chrX:32,274,692G>A      |         |                 | Myalgia, myoglobinuria                 |        |                |
| chr2:179,446,219ATACT>A | TTN     | Skeletal muscle | Fetal akinesia                         | 349.5  | 47.63          |
| chr2:179,642,185G>A     |         |                 | Multi/minicore congenital myopathy     |        |                |
| chr21:47,409,881C>T     | COL6A1  |                 | Collagen VI-related dystrophy          | 56.02  | 16.25          |
| chr21:47,409,881C>T     |         |                 |                                        |        |                |
| chr19:38,958,362C>T     | RYR1    |                 | Congenital fiber-type disproportion    | 425.5  | 3.45           |
| chr1:46,655,129C>A      | POMGNT1 |                 | $\alpha$ -Dystroglycanopathy           | 29.26  | 6.01           |
| chr17:41,199,655C>G     | BRCA1   | LCL             | Inherited breast cancer susceptibility | 19.985 | 217.19         |
| chr17:41,246,879T>C     |         |                 |                                        |        |                |
| chr17:41,246,879T>C     |         |                 |                                        |        |                |
| chr17:41,246,879T>C     |         |                 |                                        |        |                |
| chr17:41,258,551C>A     | BRCA2   |                 |                                        | 10.16  | Unfeasible     |
| chr13:32,945,238G>A     |         |                 |                                        |        |                |
| chr13:32,969,074A>T     |         |                 |                                        |        |                |
| chr19:33,892,776C>T     | PEPD    |                 | Prolidase deficiency                   | 18.89  | 28.31          |
| chr20:35,526,363C>G     | SAMHD1  | Whole blood     | Aicardi-Goutières syndrome             | 48.53  | 24.68          |
| chr23:153,997,595G>A    | MED13L  |                 | MRFACD                                 | 5.89   | 262.34         |

**Table S1.** Summary of pathogenic splicing events analyzed in this study. All co-ordinates are given in relation to the GRCh37 genome build. TPM, transcripts per million; MRSD, minimum required sequencing depth.

| Tissue | No. samples | Source                        | Sequencing type                               | Usage                                                                                                        |
|--------|-------------|-------------------------------|-----------------------------------------------|--------------------------------------------------------------------------------------------------------------|
| Blood  | 151         | GTEx                          | 75-bp paired end poly-A enrichment, Illumina  | Generation of MRSD model, bootstrapping analysis of event counts                                             |
| LCL    | 91          |                               |                                               |                                                                                                              |
| Muscle | 184         |                               |                                               |                                                                                                              |
| Blood  | 1           | Inhouse                       | 150-bp paired end globin depletion, Illumina  | Collation of known pathogenic mis-splicing events                                                            |
|        | 12          |                               | 75-bp paired end poly-A enrichment, Illumina  | Collation of known pathogenic mis-splicing events & MRSD model validation                                    |
| LCL    | 20          |                               | 150-bp paired end poly-A enrichment, Illumina | Collation of known pathogenic mis-splicing events                                                            |
|        | 4           |                               | 75-bp paired end poly-A enrichment, Illumina  | MRSD model validation                                                                                        |
| Muscle | 52          | Previously published data (3) | 75-bp paired end poly-A enrichment, Illumina  | Collation of known pathogenic mis-splicing events, downsampling of pathogenic events & MRSD model validation |

**Table S2.** Summary of RNA-seq datasets utilized in this study. RNA-seq datasets derived using different methodologies were used for various aspects of this study. All data used to generate the MRSD model was based on data from the GTEx consortium across all three analyzed tissues.

## Methods S1.

*Minimum required sequencing depth (MRSD) score (further elaboration).*

MRSD is defined for an individual transcript in a given sample as:

$$MRSD_m = r / \left( \frac{R_p}{d} \right)$$

Where  $r$  is the desired level of read coverage across desired proportion  $p$  of splice junctions,  $R$  is the set of read counts supporting each of the splice junctions in the transcript of interest, ordered from lowest to highest, and  $R_p$  is the read count at the position in  $R$  at which proportion  $p$  of read counts values in  $R$  are greater than or equal to it.  $d$  represents the total number of sequencing reads, in millions of reads, in the RNA-seq sample (by default, the number of uniquely mapping sequencing reads), and ( $m$ ) represents the MRSD parameter.

For instance, suppose a sample sequenced to a depth ( $d$ ) of 40 M uniquely mapping sequencing reads generates coverage of 14, 16, 6 and 10 reads across the splice junctions of a five-exon transcript. Suppose we wish 75% of splice junctions to be covered by a minimum of 6 reads (i.e.  $p = 0.75$  and  $r = 6$ ). Here,  $R = \{6, 10, 14, 16\}$  and  $R_p = 10$ , as 3/4 (75%, i.e.  $p$ ) of all values in  $R$  are greater than or equal to 10. Inserting these values into the formula shows that this transcript has an MRSD of  $\frac{6}{10/40} = 24$  M uniquely mapping sequencing reads in this sample.

The set of MRSD scores for the given transcript are then collated across all control samples and ordered from lowest to highest. The score at the  $m$ -th percentile position in the collated list of sample-specific MRSDs is returned as the overall MRSD for that transcript, where  $m$  is termed the “MRSD parameter” and is customizable by the user (default = 0.95). The  $MRSD_{0.99}$  of a transcript represents the sequencing depth that would be required for 99% of control samples to achieve the specified coverage for that transcript. The MRSD parameter therefore approximately represents the likelihood that a sequencing run at the returned depth will yield the desired coverage level.

*Illustration of MRSD calculation methodology.* MRSD scores utilize the level of read coverage supporting the existence of splice junctions in control RNA-seq datasets to predict the depth of sequencing required to achieve a specified level of splice junction coverage in a transcript of interest. For a given transcript in a given individual:

1. Read coverage values are collated across all splice junctions in the transcript model (with a single transcript assigned to each gene if investigating at the gene level, see Methods S2, below)
2. Each of these values is divided by the sequencing depth – by default defined as the number of uniquely mapping sequencing reads (in millions of reads) to produce a per-1 M read coverage value for each junction
3. The desired level of read coverage is divided by the per-1 M read coverage value of the splice junction with the  $X$ 'th percentile lowest read coverage, which gives the depth of sequencing that would be required for  $X\%$  of junctions to be covered with the desired number of reads or higher. This figure is the sample-specific MRSD.

The sample-specific MRSDs are collated across all control RNA-seq samples, and a global MRSD is then derived by taking the  $m$ -th percentile highest prediction from among these;  $m$  is termed the MRSD parameter, and represents the proportion of control RNA-seq samples for which sequencing at the returned MRSD would have sufficiently covered that gene. By



extension, it is also an approximate measure of the likelihood that a subsequent RNA-seq run at the returned depth will yield the specified coverage.

**1. Collation of splice junction read supports**

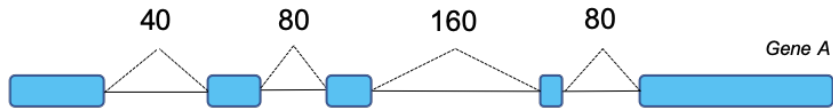

Coverage of splice junctions in individual X (sequenced to depth of 40 M reads)

**2. Calculation of per-1 M read coverage**

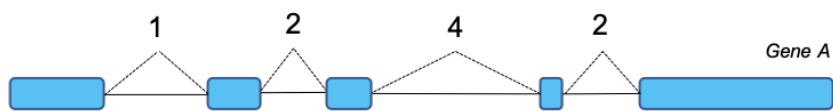

Coverage of splice junctions per 1 M reads in individual X

**3. Inference of MRSD for specified coverage parameters**

e.g. for 75% of splice junctions to be covered by 8 reads or more:

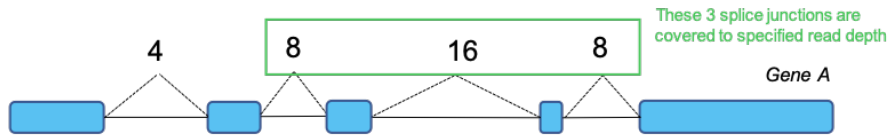

Coverage of splice junctions per 4 M reads in individual X

↳ **MRSD = 4 M reads**

**Methods S2.** *Tiering methodology for selection of transcripts for MRSD generation.* To calculate MRSD values for all protein-coding genes, a single transcript model was established for each gene. Firstly, transcripts present in the MANE v0.7 curated transcript set were selected for genes where these existed, provided the co-ordinates of all splice junctions in that transcript (given in relation to the GRCh38 reference genome) mapped back to known junctions in build GRCh37. For genes where these conditions were not met, transcript models were formed from the union of all junctions present in all RefSeq transcripts listed for that gene on Ensembl BioMart. Finally, for any genes lacking a corresponding RefSeq transcript(s), a transcript model was derived consisting of the union of all junctions present in all transcripts assigned to that gene in the GENCODE v19 annotation.

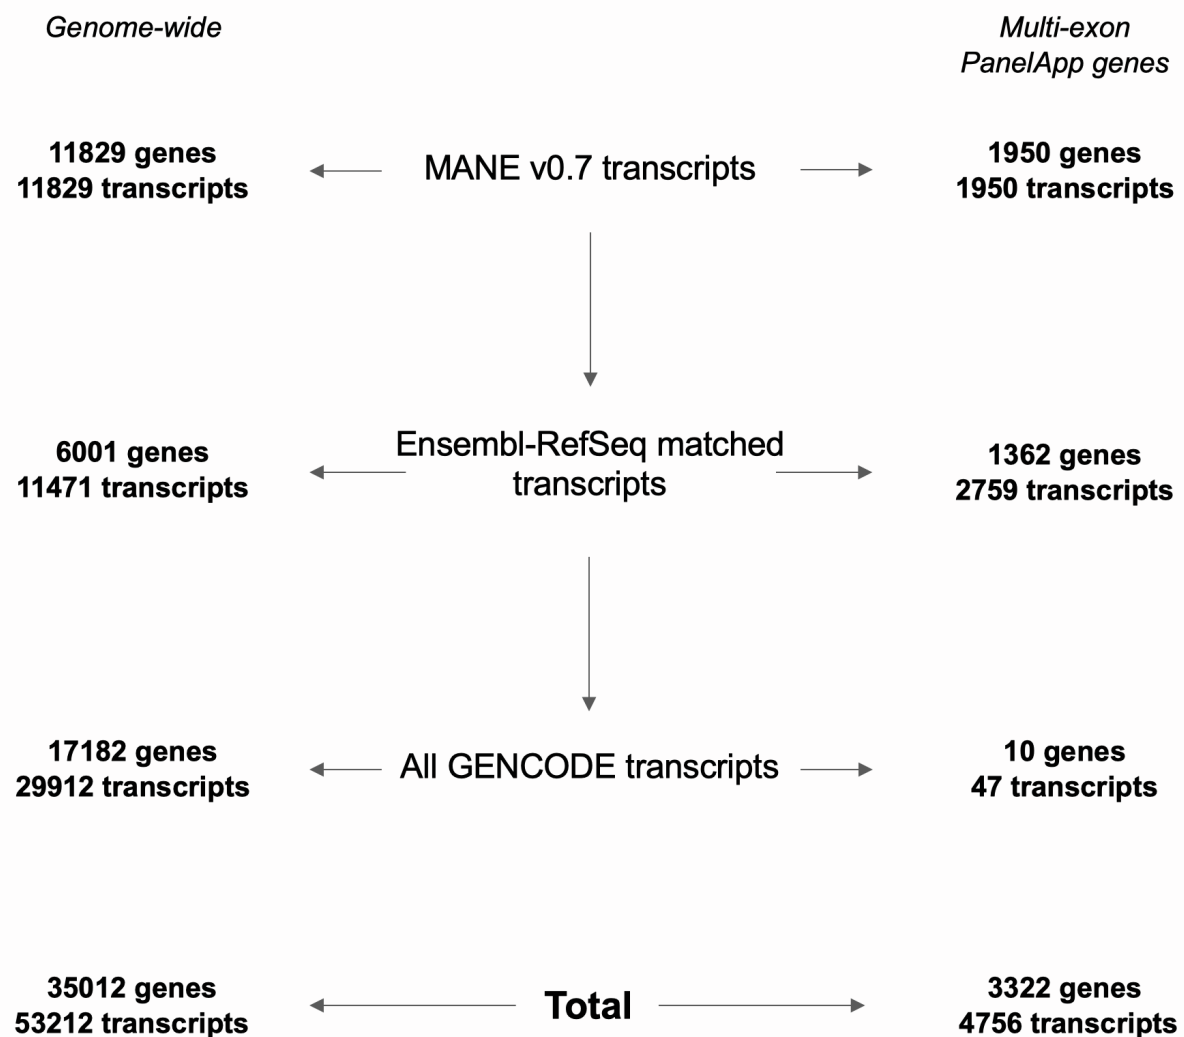

**Methods S3. Tissue-specific criteria for filtering of high-quality GTEx control RNA-seq datasets.** Filtering of GTEx controls was conducted to select the highest quality samples based on the below tissue-specific parameters. Parameters were selected and adjusted on a tissue-by-tissue basis to exclude metric outliers and samples that may confound analysis of pathogenic splicing events (e.g. excluding cancer patients from LCL control cohorts, in which inherited breast cancer was studied). The corresponding column names in the GTEx v8 sample attribute (pht002743.v8) and subject phenotype (pht002742.v8) files are italicized.

*Skeletal muscle (as listed in [1])*

- RNA integrity number/RIN (*SMRIN*): between 6-9
- Sample ischemic time (*SMTSISCH*): <720 (i.e. <12 hours)
- Hardy scale (*DTHHRDY*): 0, 1 or 2, corresponding to sudden deaths
- Age (*AGE*): <50
  - Unless BMI <30

*Whole blood*

- Samples included in GTEx analysis freeze, corresponding to higher quality samples (*SMAFRZE*): not flagged EXCLUDE due to technical issues
- RIN (*SMRIN*): between 6-9
- Sample ischemic time (*SMTSISCH*): <0
- Hardy scale (*DTHHRDY*): 0, 1 or 2

*EBV-transformed lymphocytes (LCLs)*

- *SMAFRZE*: not flagged EXCLUDE due to technical issues
- RIN (*SMRIN*): > 9
- *MHCANCER5*, *MHCANCERC* and *MHCANCERNM* all 0 to eliminate all non-metastatic cancers and all cancers in the past 5 years or current
- *DTHHRDY*: 0, 1 or 2
- No reported history (*MHGNCMT*) of:
  - Breast cancer
  - Ovarian cancer
  - Pancreatic cancer
  - Prostate cancer
  - Colorectal cancer
  - No patients filtered out through this criterion

*Cultured fibroblasts*

- As for EBV-transformed lymphocytes, except with the addition of the following:
  - RIN (*SMRIN*) > 9.7
  - Uniquely mapping reads (*MPPDUN*): > 60 M

**Methods S4.** *Sample IDs of GTEX samples used to generate control datasets.*

**Skeletal muscle** (as listed in [1])

GTEX-111CU-2026  
GTEX-111YS-2326  
GTEX-1122O-2426  
GTEX-113JC-2726  
GTEX-117YX-2526  
GTEX-11DXX-2726  
GTEX-11DXZ-2426  
GTEX-11EM3-2126  
GTEX-11EMC-2626  
GTEX-11EQ9-2126  
GTEX-11I78-2426  
GTEX-11LCK-1226  
GTEX-11NSD-2026  
GTEX-11P81-2526  
GTEX-11P82-1826  
GTEX-11VI4-1926  
GTEX-11WQC-2626  
GTEX-11WQK-0726  
GTEX-11XUK-2226  
GTEX-11ZTT-2626  
GTEX-11ZVC-2726  
GTEX-1211K-2126  
GTEX-12BJ1-2526  
GTEX-12C56-1926  
GTEX-12WSJ-1726  
GTEX-12WSN-2526  
GTEX-12ZZX-0326  
GTEX-12ZZY-0626  
GTEX-13111-2226  
GTEX-1314G-1726  
GTEX-131XF-2326  
GTEX-131XG-2326  
GTEX-132AR-1026  
GTEX-132NY-0726  
GTEX-1339X-2426  
GTEX-133LE-2026  
GTEX-1399Q-2426  
GTEX-1399R-2526  
GTEX-1399S-2726  
GTEX-1399U-2526  
GTEX-139D8-0726  
GTEX-139UW-2626  
GTEX-139YR-2526  
GTEX-13CF3-1826  
GTEX-13D11-2526  
GTEX-13FH7-2126  
GTEX-13FHO-0726  
GTEX-13FTW-2326  
GTEX-13FTY-0226  
GTEX-13FXS-0326  
GTEX-OIZH-1626  
GTEX-OOBJ-1626  
GTEX-P4PP-1626  
GTEX-P4PQ-1626  
GTEX-P78B-1626  
GTEX-POMQ-1926-SM-3NB1Y  
GTEX-POYW-0526-SM-2XCEY  
GTEX-PSDG-0426  
GTEX-PWCY-2026  
GTEX-Q2AH-1826-SM-2S1Q2  
GTEX-Q734-2026-SM-3GADA  
GTEX-QCQG-2126-SM-2S1P8  
GTEX-QDVN-2426-SM-2S1Q4  
GTEX-QV44-2026-SM-2S1RD  
GTEX-R53T-1826-SM-3GIJX  
GTEX-R55D-0626-SM-3GAD5  
GTEX-S32W-2326-SM-2XCAW  
GTEX-S33H-2226  
GTEX-S7SF-2026-SM-3K2AS  
GTEX-SNMC-1426-SM-2XCFM  
GTEX-SUCS-1626-SM-32PLS  
GTEX-T5JC-0626-SM-3NMA6  
GTEX-T5JW-1826-SM-3GAE1  
GTEX-TKQ2-0826-SM-33HB6  
GTEX-TML8-1826-SM-32QOR  
GTEX-TMMY-0426-SM-33HBB  
GTEX-U3ZG-0326-SM-47JXN  
GTEX-U3ZH-1926-SM-4DXTR  
GTEX-U3ZM-1226-SM-3DB9G  
GTEX-U4B1-1626-SM-3DB8N  
GTEX-UJHI-1726-SM-3DB9B  
GTEX-UJMC-1826-SM-3GADT  
GTEX-VUSG-2626-SM-4KKZI  
GTEX-WHPG-2226-SM-3NMBO  
GTEX-WHSB-1826-SM-3TW8M  
GTEX-WOFM-1326-SM-3MJFR  
GTEX-WRHK-1626-SM-3MJFH  
GTEX-WRHU-0826-SM-3MJFN  
GTEX-WXYG-2526-SM-3NB3F  
GTEX-WY7C-2526-SM-3NB2N  
GTEX-WZTO-0826-SM-3NM8Q  
GTEX-X4XY-0626-SM-4E3IN  
GTEX-X638-0326-SM-47JY1  
GTEX-X88G-0326-SM-47JZ4  
GTEX-XBEC-0626  
GTEX-XBED-2626-SM-4E3J5  
GTEX-XBEW-1026  
GTEX-XOTO-0526-SM-4B662  
GTEX-XPT6-2026-SM-4B64V  
GTEX-XQ8I-0626-SM-4BOPT

GTEX-13JUV-2326  
GTEX-13N11-2726  
GTEX-13N2G-2326  
GTEX-13N29-0626  
GTEX-13N2B-2626  
GTEX-13O61-2326  
GTEX-13OVG-2126  
GTEX-13OVH-0626  
GTEX-13OVI-1726  
GTEX-13OW6-0626  
GTEX-13PL7-0626  
GTEX-13PVR-2526  
GTEX-13QBU-2426  
GTEX-13QJ3-0726  
GTEX-13S7M-0326  
GTEX-13S86-2326  
GTEX-13U4I-1826  
GTEX-13VXT-0326  
GTEX-13W3W-2626  
GTEX-13W46-0726  
GTEX-13YAN-0526  
GTEX-144GL-0326  
GTEX-144GM-2026  
GTEX-144GN-2426  
GTEX-145LT-1626  
GTEX-145LV-2326  
GTEX-145ME-2026  
GTEX-145MI-0326  
GTEX-145MN-2426  
GTEX-146FH-0526  
GTEX-146FQ-0326  
GTEX-147F3-0226  
GTEX-1497J-2626  
GTEX-14A6H-2826  
GTEX-14AS3-2126  
GTEX-14BMV-0326  
GTEX-14C39-2426  
GTEX-14ICL-1926  
GTEX-O5YT-1626-SM-32PK6  
GTEX-OHPK-1626-SM-2YUN3  
GTEX-OHPL-1626  
GTEX-OHPM-1626

GTEX-XUJ4-2626-SM-4BOQ3  
GTEX-XUW1-0826-SM-4BOP6  
GTEX-XUYS-0326-SM-47JX2  
GTEX-XUZC-2126-SM-4BRW8  
GTEX-XV7Q-2926-SM-4BRUL  
GTEX-XYKS-2426-SM-4AT43  
GTEX-Y114-2526  
GTEX-Y3IK-2626  
GTEX-Y5LM-2126  
GTEX-Y5V5-2526  
GTEX-Y5V6-2626  
GTEX-Y8E4-1026  
GTEX-Y8E5-0326  
GTEX-Y8LW-2026  
GTEX-Y9LG-1926  
GTEX-YB5E-2226  
GTEX-YB5K-2326  
GTEX-YBZK-0326  
GTEX-YEC3-2126  
GTEX-YEC4-2226  
GTEX-YF7O-2526  
GTEX-YFC4-1026  
GTEX-Z9EW-1726  
GTEX-ZA64-2026  
GTEX-ZAKK-0326  
GTEX-ZC5H-0326  
GTEX-ZDYS-1726  
GTEX-ZPCL-2026  
GTEX-ZPIC-2526  
GTEX-ZQG8-1226  
GTEX-ZQUD-1726  
GTEX-ZT9X-1826  
GTEX-ZTPG-0126  
GTEX-ZTX8-1626  
GTEX-ZV6S-2126  
GTEX-ZV7C-2426  
GTEX-ZVZO-0326  
GTEX-ZVZP-2526  
GTEX-ZY6K-2026  
GTEX-ZYFG-2426  
GTEX-ZYWO-2626  
GTEX-ZZ64-1526

## Whole blood

GTEX-113JC-0006-SM-5O997  
GTEX-1192W-0005-SM-5NQBQ  
GTEX-11DXX-0005-SM-5NQB8  
GTEX-11EMC-0006-SM-5O9DN  
GTEX-11GSP-0006-SM-5N9EL  
GTEX-11I78-0005-SM-5N9GB  
GTEX-11LCK-0005-SM-5O98U  
GTEX-11OF3-0006-SM-5O9CM  
GTEX-11ONC-0005-SM-5O9CY  
GTEX-11P7K-0006-SM-5N9FM  
GTEX-11P82-0006-SM-5N9FY  
GTEX-11TT1-0005-SM-5NQB8Y  
GTEX-11VI4-0006-SM-5N9D8  
GTEX-11WQK-0005-SM-5O9AV  
GTEX-11ZTT-0006-SM-5N9FX  
GTEX-1212Z-0006-SM-5NQB8M  
GTEX-1269C-0005-SM-5N9CJ  
GTEX-12C56-0006-SM-5N9E9  
GTEX-12KS4-0005-SM-5SI94  
GTEX-12WSI-0005-SM-5O99K  
GTEX-12WSK-0006-SM-5NQA1  
GTEX-12WSM-0005-SM-5NQB3  
GTEX-12WSN-0006-SM-5NQAP  
GTEX-12ZZX-0005-SM-5O9A9  
GTEX-13113-0006-SM-5NQB7X  
GTEX-1314G-0005-SM-5NQB9O  
GTEX-131XE-0006-SM-5P9F9  
GTEX-131XG-0006-SM-5O9CE  
GTEX-132NY-0005-SM-5O9AC  
GTEX-1399R-0006-SM-5N9FR  
GTEX-139UW-0005-SM-5NQB8U  
GTEX-13CF3-0006-SM-5N9ED  
GTEX-13FTX-0005-SM-5N9F6  
GTEX-13FXS-0006-SM-5O99X  
GTEX-13OVG-0005-SM-5P9HA  
GTEX-13OVH-0005-SM-5P9HB  
GTEX-13OVI-0001-SM-5O9BL  
GTEX-13OVK-0006-SM-5O9B7  
GTEX-13OVL-0006-SM-5O996  
GTEX-13OW6-0005-SM-5NQB9Z  
GTEX-13OW8-0005-SM-5NQBAC  
GTEX-13PL7-0005-SM-5N9ET  
GTEX-13S7M-0005-SM-5NQB76  
GTEX-13VXT-0005-SM-5N9F3  
GTEX-147F3-0005-SM-5N9FI  
GTEX-147JS-0006-SM-5NQB7K  
GTEX-148VI-0006-SM-5O9A6  
GTEX-14A5H-0006-SM-5O9AI  
GTEX-14AS3-0006-SM-5NQB2C  
GTEX-14B4R-0006-SM-5O9A7  
GTEX-14BMV-0005-SM-5NQB6Y  
GTEX-14C38-0006-SM-5NQB8F  
GTEX-14C39-0005-SM-5NQB8R

GTEX-QEG5-0006-SM-2I5FZ  
GTEX-QESD-0006-SM-2I5G6  
GTEX-R55C-0005-SM-3GAE9  
GTEX-RWS6-0005-SM-2XCAN  
GTEX-S341-0006-SM-3NM8D  
GTEX-SSA3-0005-SM-32QOT  
GTEX-T5JW-0005-SM-3GADE  
GTEX-T6MN-0005-SM-32PLJ  
GTEX-T6MO-0006-SM-32QOU  
GTEX-T8EM-0006-SM-3DB71  
GTEX-TKQ1-0006-SM-33HBI  
GTEX-TKQ2-0006-SM-33HBH  
GTEX-TML8-0005-SM-32QPA  
GTEX-TMZS-0006-SM-3DB8G  
GTEX-U3ZG-0006-SM-47JWX  
GTEX-U3ZH-0005-SM-3DB72  
GTEX-U4B1-0006-SM-3DB8E  
GTEX-UJMC-0005-SM-3GACU  
GTEX-UPJH-0006-SM-3GACW  
GTEX-V1D1-0006-SM-3NMCE  
GTEX-V955-0005-SM-3P5ZC  
GTEX-VJYA-0005-SM-3P5ZD  
GTEX-VUSG-0006-SM-3GIK9  
GTEX-WCDI-0005-SM-3NB2M  
GTEX-WFG7-0005-SM-3GIKM  
GTEX-WFON-0005-SM-3NMC9  
GTEX-WH7G-0005-SM-3NMBX  
GTEX-WHPG-0006-SM-3NMBV  
GTEX-WHSB-0005-SM-3LK7C  
GTEX-WHWD-0005-SM-3LK7D  
GTEX-WOFL-0006-SM-3TW8K  
GTEX-WOFM-0005-SM-3MJF3  
GTEX-WQUQ-0006-SM-3MJF4  
GTEX-WRHK-0005-SM-3MJF5  
GTEX-WRHU-0006-SM-3MJF6  
GTEX-WVLH-0006-SM-3MJF7  
GTEX-WXYG-0005-SM-3NB3M  
GTEX-WY7C-0006-SM-3NB3L  
GTEX-WYVS-0006-SM-3NMA7  
GTEX-WZTO-0006-SM-3NM9T  
GTEX-X15G-0005-SM-3NMDA  
GTEX-X3Y1-0006-SM-3P5ZG  
GTEX-X5EB-0006-SM-46MV5  
GTEX-X638-0005-SM-47JX6  
GTEX-X88G-0006-SM-47JX5  
GTEX-XBED-0006-SM-47JXO  
GTEX-XBEW-0006-SM-4AT4E  
GTEX-XMK1-0005-SM-4B665  
GTEX-XPT6-0006-SM-4B66Q  
GTEX-XXEK-0005-SM-4BRWJ  
GTEX-XYKS-0005-SM-4BRUD  
GTEX-Y114-0006-SM-4TT76  
GTEX-Y5LM-0005-SM-4V6EJ

GTEX-14DAR-0006-SM-5N9GC  
GTEX-14E1K-0006-SM-5N9DY  
GTEX-14H4A-0006-SM-5N9E3  
GTEX-14ICK-0006-SM-5NQB5  
GTEX-14ICL-0006-SM-5SIAB  
GTEX-N7MT-0007-SM-3GACQ  
GTEX-O5YT-0007-SM-32PK7  
GTEX-O5YW-0006-SM-3LK6E  
GTEX-OHPL-0006-SM-3MJHB  
GTEX-OIZF-0006-SM-2I5GQ  
GTEX-OIZI-0005-SM-2XCED  
GTEX-OXRP-0006-SM-2I3FN  
GTEX-P4QS-0005-SM-2I3EY  
GTEX-P78B-0005-SM-2I5GM  
GTEX-PLZ5-0006-SM-5S2W5  
GTEX-PLZ6-0006-SM-33HBZ  
GTEX-POMQ-0006-SM-5SI7D  
GTEX-PSDG-0005-SM-3GADC  
GTEX-PVOW-0006-SM-3NMB8  
GTEX-PW2O-0006-SM-2I3DV  
GTEX-PWCY-0005-SM-33HBP  
GTEX-Q2AG-0005-SM-5SI7F  
GTEX-Q2AH-0005-SM-33HBR  
GTEX-Q2AI-0006-SM-2I3FG  
GTEX-QCQG-0006-SM-5SI8M

GTEX-Y5V5-0006-SM-4V6FE  
GTEX-Y5V6-0005-SM-4V6FD  
GTEX-Y8E4-0006-SM-4V6EW  
GTEX-Y8E5-0006-SM-47JWQ  
GTEX-Y8LW-0005-SM-4V6EV  
GTEX-Y9LG-0006-SM-4VBRK  
GTEX-YB5K-0005-SM-4VDSP  
GTEX-YBZK-0005-SM-59HKG  
GTEX-YFC4-0006-SM-4RGLV  
GTEX-ZC5H-0005-SM-4WAXM  
GTEX-ZDYS-0002-SM-4WKGR  
GTEX-ZE9C-0006-SM-4WKG2  
GTEX-ZF29-0006-SM-4WKGQ  
GTEX-ZGAY-0006-SM-4WWAQ  
GTEX-ZP4G-0006-SM-4WWE6  
GTEX-ZPIC-0005-SM-4WWEB  
GTEX-ZPU1-0006-SM-4WWAT  
GTEX-ZQG8-0005-SM-4YCEH  
GTEX-ZQUD-0005-SM-4YCE5  
GTEX-ZVE2-0006-SM-51MRW  
GTEX-ZVP2-0005-SM-51MRK  
GTEX-ZVT2-0005-SM-57WBW  
GTEX-ZVZP-0006-SM-51MSW  
GTEX-ZXES-0005-SM-57WCB



## EBV-transformed lymphocytes (LCLs)

GTEX-1122O-0003-SM-5Q5DL  
GTEX-11EM3-0001-SM-5Q5BD  
GTEX-11EMC-0002-SM-5Q5DO  
GTEX-11OC5-0004-SM-5S2O6  
GTEX-11P7K-0003-SM-5S2OU  
GTEX-11TT1-0004-SM-5S2NT  
GTEX-11VI4-0001-SM-5S2OI  
GTEX-1212Z-0002-SM-5SI6W  
GTEX-1269C-0003-SM-5S2PB  
GTEX-12BJ1-0003-SM-5SI6V  
GTEX-12C56-0002-SM-5S2PC  
GTEX-RWS6-0001-SM-3NMAL  
GTEX-S4Q7-0003-SM-3NM8M  
GTEX-S95S-0002-SM-3NM8K  
GTEX-SN8G-0001-SM-3NM8L  
GTEX-T5JC-0001-SM-3NMAK  
GTEX-T5JW-0003-SM-3NMAD  
GTEX-T6MN-0002-SM-3NMAH  
GTEX-T6MO-0003-SM-3NMAG  
GTEX-TKQ1-0003-SM-3NMAE  
GTEX-TML8-0001-SM-3NMAF  
GTEX-U3ZH-0002-SM-3NMDD  
GTEX-U3ZM-0002-SM-3NMDD  
GTEX-U3ZN-0002-SM-3NMDF  
GTEX-UPJH-0001-SM-3NMDE  
GTEX-UPK5-0003-SM-3NMDF  
GTEX-V1D1-0003-SM-3NMDF  
GTEX-VJYA-0001-SM-3NMDJ  
GTEX-VUSG-0003-SM-3NMDK  
GTEX-W5WG-0002-SM-3NMDN  
GTEX-W5X1-0001-SM-3P61V  
GTEX-WFG7-0001-SM-3P61S  
GTEX-WFG8-0001-SM-4LVN8  
GTEX-WFJO-0002-SM-3P61X  
GTEX-WFON-0001-SM-3P61W  
GTEX-WHPG-0004-SM-3NMDO  
GTEX-WHSB-0002-SM-4M1ZR  
GTEX-WOFM-0001-SM-4OOT2  
GTEX-WRHK-0001-SM-4WWDD  
GTEX-WWTW-0002-SM-4MVNH  
GTEX-WXYG-0004-SM-4MVOS  
GTEX-WY7C-0004-SM-4ONDS  
GTEX-WYVS-0004-SM-4ONDT  
GTEX-WZTO-0001-SM-4PQZY  
GTEX-X4LF-0002-SM-4QASG  
GTEX-X5EB-0004-SM-46MWA

GTEX-XBED-0003-SM-47JWP  
GTEX-XBEW-0002-SM-4AT5O  
GTEX-XGQ4-0004-SM-4AT5S  
GTEX-XMK1-0001-SM-4B64F  
GTEX-XPT6-0001-SM-4B64G  
GTEX-XQ3S-0001-SM-4B64K  
GTEX-XXEK-0004-SM-4BRWO  
GTEX-XYKS-0002-SM-4BRWN  
GTEX-Y114-0002-SM-4TT78  
GTEX-Y3IK-0001-SM-4WWE1  
GTEX-Y5LM-0003-SM-4V6G1  
GTEX-Y5V5-0001-SM-4V6FZ  
GTEX-Y5V6-0003-SM-4V6FX  
GTEX-Y8DK-0004-SM-4RGM7  
GTEX-Y8E4-0003-SM-4V6FY  
GTEX-Y9LG-0001-SM-4VBRQ  
GTEX-YB5E-0001-SM-4VDSV  
GTEX-YB5K-0003-SM-4VDSN  
GTEX-YEC3-0002-SM-4W1YI  
GTEX-YEC4-0002-SM-4W1Z6  
GTEX-YF7O-0004-SM-4W1ZT  
GTEX-YFCO-0003-SM-4W21I  
GTEX-ZC5H-0004-SM-4WAXK  
GTEX-ZDTS-0001-SM-4WAXW  
GTEX-ZDTT-0004-SM-4WKG3  
GTEX-ZEX8-0004-SM-4WKFK  
GTEX-ZF29-0002-SM-4WKFF  
GTEX-ZF2S-0004-SM-4WKFE  
GTEX-ZF3C-0001-SM-4WWAW  
GTEX-ZG7Y-0003-SM-4WWEJ  
GTEX-ZLWG-0004-SM-4WWD5  
GTEX-ZP4G-0003-SM-4WWED  
GTEX-ZPIC-0002-SM-4WVEC  
GTEX-ZPU1-0004-SM-4WWAV  
GTEX-ZQG8-0001-SM-4YCDH  
GTEX-ZQUD-0003-SM-4YCD3  
GTEX-ZT9W-0003-SM-4YCE6  
GTEX-ZT9X-0004-SM-4YCDT  
GTEX-ZTPG-0002-SM-4YCEI  
GTEX-ZUA1-0002-SM-4YCF7  
GTEX-ZV6S-0003-SM-4YCCT  
GTEX-ZV7C-0003-SM-4YCF6  
GTEX-ZVT2-0001-SM-57WCK  
GTEX-ZVTK-0003-SM-51MRV  
GTEX-ZVZP-0004-SM-51MS8



## Cultured fibroblasts

GTEX-111YS-0008-SM-5Q5BH  
GTEX-113JC-0008-SM-5QGR6  
GTEX-117XS-0008-SM-5Q5DQ  
GTEX-1192W-0008-SM-5QGRE  
GTEX-11DXX-0008-SM-5Q5B8  
GTEX-11DXY-0008-SM-5QGR4  
GTEX-11EMC-0008-SM-5Q5DR  
GTEX-11GSP-0008-SM-5Q5DM  
GTEX-11I78-0008-SM-5Q5DI  
GTEX-11LCK-0008-SM-5Q5BB  
GTEX-11NSD-0008-SM-5Q5BC  
GTEX-11NUK-0008-SM-5Q5B9  
GTEX-11NV4-0008-SM-5Q5BA  
GTEX-11O72-0008-SM-5Q5DN  
GTEX-11OC5-0008-SM-5S2OH  
GTEX-11OF3-0008-SM-5S2NH  
GTEX-11ONC-0008-SM-5S2MG  
GTEX-11P7K-0008-SM-5S2O5  
GTEX-11P81-0008-SM-5S2OT  
GTEX-11P82-0008-SM-5S2MS  
GTEX-11PRG-0008-SM-5S2N5  
GTEX-11TT1-0008-SM-5S2P8  
GTEX-11TUW-0008-SM-5SI6S  
GTEX-11WQC-0008-SM-5SI6R  
GTEX-11WQK-0008-SM-5SI6T  
GTEX-11XUK-0008-SM-5S2WD  
GTEX-11ZTS-0008-SM-5S2VC  
GTEX-11ZTT-0008-SM-5S2TZ  
GTEX-11ZUS-0008-SM-5S2UO  
GTEX-1211K-0008-SM-5S2W1  
GTEX-12126-0008-SM-5S2UC  
GTEX-12WSH-0008-SM-5S2V1  
GTEX-12WSM-0008-SM-5S2VD  
GTEX-1399U-0008-SM-5S2VE  
GTEX-N7MS-0008-SM-4E3JI  
GTEX-NFK9-0008-SM-4E3JE  
GTEX-NL3G-0008-SM-4E3JX  
GTEX-O5YT-0008-SM-4E3IQ  
GTEX-O5YW-0008-SM-4E3IE  
GTEX-OHPK-0008-SM-4E3JL  
GTEX-OHPL-0008-SM-4E3I9  
GTEX-OHPM-0008-SM-4E3IP  
GTEX-OHPN-0008-SM-4E3HW  
GTEX-OIZG-0008-SM-4E3J2  
GTEX-OIZI-0008-SM-2XCFD  
GTEX-OOBJ-0008-SM-3NB26  
GTEX-OOBK-0008-SM-3NB27  
GTEX-OXRK-0008-SM-3NB28  
GTEX-T2IS-0008-SM-4DM75  
GTEX-T5JC-0008-SM-4DM6A  
GTEX-U4B1-0008-SM-4DXUW  
GTEX-U8T8-0008-SM-4DXSP  
GTEX-UJHI-0008-SM-4IHL1  
GTEX-UJMC-0008-SM-4IHKK  
GTEX-UPK5-0008-SM-4IHJD  
GTEX-V1D1-0008-SM-4JBIJ  
GTEX-W5X1-0008-SM-4LMKA  
GTEX-WFG7-0008-SM-4LMKB  
GTEX-WHPG-0008-SM-4M1ZQ  
GTEX-WHSB-0008-SM-4M1ZP  
GTEX-WHWD-0008-SM-4OOSU  
GTEX-WI4N-0008-SM-4OOSV  
GTEX-WL46-0008-SM-4OOSW  
GTEX-WQUQ-0008-SM-4OOT1  
GTEX-WRHU-0008-SM-4MVPB  
GTEX-WVJS-0008-SM-4MVPC  
GTEX-WVLH-0008-SM-4MVPD  
GTEX-WY7C-0008-SM-4ONDW  
GTEX-WYBS-0008-SM-4ONDX  
GTEX-WYJK-0008-SM-4ONDV  
GTEX-WYVS-0008-SM-4ONDY  
GTEX-WZTO-0008-SM-4PQZZ  
GTEX-X15G-0008-SM-4PR2D  
GTEX-X3Y1-0008-SM-4PR12  
GTEX-X4LF-0008-SM-4QAST  
GTEX-XBEC-0008-SM-4AT3X  
GTEX-XBEW-0008-SM-4AT3Y  
GTEX-XMD2-0008-SM-4WWE7  
GTEX-XMD3-0008-SM-4AT4V  
GTEX-XMK1-0008-SM-4GICF  
GTEX-XOT4-0008-SM-4B664  
GTEX-XPT6-0008-SM-4B64Q  
GTEX-XPVG-0008-SM-4GICH  
GTEX-XQ3S-0008-SM-4GIDZ  
GTEX-XUW1-0008-SM-4BOQH  
GTEX-XV7Q-0008-SM-4BRWL  
GTEX-Y8E4-0008-SM-4V6FW  
GTEX-Y9LG-0008-SM-4VBRJ  
GTEX-YB5K-0008-SM-4VDT8  
GTEX-YEC4-0008-SM-4W1YR  
GTEX-YF7O-0008-SM-4W1ZS  
GTEX-YJ89-0008-SM-4RGM4  
GTEX-Z93S-0008-SM-4RGM5  
GTEX-ZC5H-0008-SM-4WAX8  
GTEX-ZDTS-0008-SM-4E3I8  
GTEX-ZDTT-0008-SM-4E3K5

GTEX-OXRL-0008-SM-3NB29  
GTEX-P4PP-0008-SM-48TDV  
GTEX-P4QT-0008-SM-48TDZ  
GTEX-PSDG-0008-SM-48TE5  
GTEX-PW2O-0008-SM-48TEB  
GTEX-PWCY-0008-SM-48TE9  
GTEX-PX3G-0008-SM-48U2L  
GTEX-Q2AH-0008-SM-48U2J  
GTEX-QCQG-0008-SM-48U2G  
GTEX-QLQ7-0008-SM-447AW  
GTEX-QXCU-0008-SM-48FCH  
GTEX-R45C-0008-SM-48FF2  
GTEX-R55C-0008-SM-48FCF  
GTEX-R55D-0008-SM-48FEV  
GTEX-R55E-0008-SM-48FCG  
GTEX-R55G-0008-SM-48FEX  
GTEX-RM2N-0008-SM-48FF3  
GTEX-RN64-0008-SM-48FEZ  
GTEX-RNOR-0008-SM-48FEY  
GTEX-RU1J-0008-SM-46MV9  
GTEX-RU72-0008-SM-46MV8  
GTEX-RWS6-0008-SM-47JYV  
GTEX-RWSA-0008-SM-47JYX  
GTEX-S33H-0008-SM-4AD6C  
GTEX-S4Z8-0008-SM-33HAZ  
GTEX-SE5C-0008-SM-4B64J  
GTEX-SJXC-0008-SM-4DM7G

GTEX-ZDXO-0008-SM-4E3HR  
GTEX-ZDYS-0008-SM-4E3IX  
GTEX-ZE7O-0008-SM-4E3JQ  
GTEX-ZEX8-0008-SM-4E3JU  
GTEX-ZF2S-0008-SM-4E3IK  
GTEX-ZF3C-0008-SM-4E3IL  
GTEX-ZLWG-0008-SM-4E3J4  
GTEX-ZP4G-0008-SM-4E3I4  
GTEX-ZPIC-0008-SM-4E3JF  
GTEX-ZPU1-0008-SM-4E3IR  
GTEX-ZQG8-0008-SM-4E3J9  
GTEX-ZQUD-0008-SM-4YCCU  
GTEX-ZT9W-0008-SM-4YCDJ  
GTEX-ZT9X-0008-SM-4YCD7  
GTEX-ZTPG-0008-SM-4YCEK  
GTEX-ZTX8-0008-SM-4YCDV  
GTEX-ZUA1-0008-SM-4YCEW  
GTEX-ZV68-0008-SM-4YCCV  
GTEX-ZV6S-0008-SM-4YCF9  
GTEX-ZV7C-0008-SM-57WCL  
GTEX-ZVE2-0008-SM-51MRU  
GTEX-ZVP2-0008-SM-51MSL  
GTEX-ZVT2-0008-SM-57WC9  
GTEX-ZVT3-0008-SM-51MRI  
GTEX-ZVTK-0008-SM-57WDA  
GTEX-ZVZP-0008-SM-51MSX  
GTEX-ZXES-0008-SM-57WCX

## Supplementary Results

### ***Minimum required sequencing depth (MRSD) scores differ across biosamples***

For all but one parameter combination, moving from  $MRSD_{0.95}$  to  $MRSD_{0.99}$  resulted in an increase in median MRSD of between 26.19-155.40%. However, when stipulating 95% splice junction coverage for skeletal muscle samples, we observed a decrease of 4.66% in MRSD scores for  $MRSD_{0.95}$  ( $n = 1323$ , median = 42.52) compared to  $MRSD_{0.99}$  ( $n = 973$ , median = 40.54); this was accounted for by an increase in the number of genes that were considered “unfeasible” for surveillance, i.e. those for which zero reads cover the given proportion of junctions ( $n$  unfeasible  $MRSD_{0.95} = 1873$ ,  $n$  unfeasible  $MRSD_{0.99} = 2193$ ). This definition of feasibility is limited by the sequencing depth of the reference sets on which the predictions are based. Ultra-deep sequencing of the same reference sets, may have enabled feasible MRSD predictions for an increased number of splicing junctions.

### ***Impact of read length on MRSD accuracy***

To assess whether the MRSD scores themselves were altered through derivation from 75 bp or 150 bp RNA-seq reference sets, we generated paired MRSD scores from datasets that were trimmed from 150 bp to 75 bp reads (Figure S7). We were able to calculate MRSD scores for 54.2% of multi-exon disease-associated genes (1802/3322) from these datasets. 86.5% (243/1802) of observable genes had lower MRSD scores from 150 bp read reference sets than from 75 bp read reference sets, or were only feasible in 150 bp reference sets. 13.5% (243/1802) counter-intuitively exhibited a higher MRSD in the 150 bp dataset, suggesting that fewer 75 bp reads were required to adequately cover these transcripts. In many examples, this could be attributed to a decrease in mapping quality of longer reads such that the reads did

not pass the quality filters of the employed pipeline<sup>13</sup>. Further work is needed to ascertain whether this discarding of longer reads is a harmful artefact of the filtering process, or a genuine removal of uninformative reads.

### ***Comparison of MRSD and TPM as a guide for appropriate surveillance***

We noted significant overlap between genes grouped into low-MRSD (< 100 M reads) and high-MRSD ( $\geq$  100 M reads) brackets. For example, among genes considered low-MRSD, TPM values ranged from 0.99-246,600, while genes with high-MRSD values had TPM values between 0.20-8644 (Figure 3D). We quantified the overlap between these distributions, demonstrating that, depending on the tissue, between 98.0% and 99.3% of high-MRSD genes had higher TPM values than at least one low-MRSD gene. We also observed that, in their respective tissues, the TPMs of 44.1-60.0%, 8.5-16.7% and 3.4-6.6% of high-MRSD genes exceeded those of the 5%, 30% and 50% least-expressed low-MRSD genes, respectively (Figure 3D). The substantial overlap in the TPM values for low and high MRSD genes suggests that relative expression does not provide a wholly accurate representation of transcript coverage in RNA-seq data. Such inconsistencies may arise from bias in the regions of genes that are sequenced, for example, genes with high degrees of 3' bias in RNA-seq datasets or significant alternative transcript usage (Figure S8).

## ***Factors influencing the likelihood of pathogenic splicing variation***

### ***identification & MRSD predictions***

To further define the most informative parameters for use in the MRSD model, we investigated the impact of a variety of metrics on the capability to identify pathogenic splicing events, including number of samples within the healthy reference set, the degree of read support for splicing junctions, and the relative expression of genes of interest. We aimed to quantify the effect of changes in these metrics on both the total number of events of interest and the position within the list of events (see Materials and Methods for filtering and ranking strategy).

We first identified how the number of control samples used as a reference set for “healthy splicing” impacted our ability to identify aberrant splicing events. For all samples within our healthy splicing set, we iteratively selected groups of control samples at sizes of 30, 60 or 90. We observed that moving from 30 to 60 controls is associated with a mean reduction in event count of 19.3% (28.1% of non-singleton events, 17.1% of singleton events) across the three tissues, while increasing the control size to 90 results in a further reduction of 10.2% of events (16.5% of non-singleton events, 9.5% of singleton events; Figure 4); this effect was consistent across tissue types.

We next investigated how read count filters impacted the number of events observed for a given individual (Figure 4). Filtering out all splicing events supported by just a single read against a background of 90 control samples removes, on average, 91.2% of events (60.4% of non-singleton events, 97.3% of singleton events). Increasing read support thresholds to 10 unique sequencing reads results in a total of 99.4% of

events being excluded on average (96.2% of non-singleton events, 99.99% of singleton events), while retaining only those events supported by 100 reads or more removes an average of 99.97% of events (99.8% of non-singleton events, 100.0% of singleton events). To understand how the level of read support impacted the ability to identify specific events, we collated 31 aberrant splicing events across 22 muscle-derived RNA-seq samples, and downsampled reads in the genes containing these events. We observed that we could identify the same aberrant splicing events at reduced relative expression levels, and, while read support decreased (Figure 5A), the ranked position of the event within the rank-ordered output remained approximately the same in most cases (Figure 5B). However, the weakened read support increased the risk of eliminating the variant from consideration when read count filters were applied (Figure 5C). This analysis further emphasized that TPM values alone may not be a reliable measure of ability to survey all splicing junctions within a gene; we observed that splice junctions in different samples covered by the same number of sequencing reads belonged to genes with widely ranging TPM values (Figure S10). For example, splice junctions covered by eight reads were identified in genes with TPMs ranging between 0.17 and 52.

Based on these investigations, we selected an eight-read coverage value for downstream analyses; as we observed that the majority of pathogenic mis-splicing events have an NRC  $\geq 0.25$ , stipulating an eight-read coverage requirement means that aberrant events should be covered by at least two reads, and so be retained when filtering single-read events from the list of splicing events. We appreciate that the use of more stringent parameters may be preferable in some use cases, such as to generate sufficient corroboration to support the reporting of a diagnostic finding to

a patient or when using significance-based tools such as FRASER, LeafCutterMD and SPOT. However, our investigations have shown this approach to be robust for the initial highlighting of aberrant splicing events for downstream analysis.

## References

1. Cummings, B.B., Marshall, J.L., Tukiainen, T., Lek, M., Donkervoort, S., Foley, A.R., et al. Improving genetic diagnosis in Mendelian disease with transcriptome sequencing. (2017). *Sci Transl Med.* 9(386).
2. The GTEx Consortium. (2013). The Genotype-Tissue Expression (GTEx) project. *Nat Genet.* 45(6), 580-585.
3. Dobin, A., Davis, C.A., Schlesinger, F., Drenkow, J., Zaleski, C., Jha, S., Batut, P., Chaisson, M., and Gingeras, T.R. (2013). STAR: ultrafast universal RNA-seq aligner. *Bioinformatics.* 29(1), 15-21.
4. Jaganathan, K., Kyriazopoulou Panagiotopoulou, S., McRae, J.F., Darbandi, S.F., Knowles, D., Li, Y.I., et al. (2019) Predicting Splicing from Primary Sequence with Deep Learning. *Cell.* 176(3):535-48.e24.
